# Supplementary material for: New Considerations for Collecting Biomechanical Data Using Wearable Sensors: How Does Inclination Influence the Number of Runs Needed to Determine a Stable Running Gait Pattern?
Source: MDPI journal article supplement (doi:10.3390/s19112516), 2019-06-01
Supplement: s1 [file s1]

```
% Script Writers: Running Injury Clinic Team, University of Calgary, Canada
%Date: 2019/02/01
% Copyright: Running Injury Clinic, University of Calgary
```

```
%% Anomaly Detection Algorithm
```

```
[m,n] = size(train);
[mm,nn] = size(test);
```

```
% Estimate mu and sigma2 from train
```

```
mu = zeros(n, 1);
sigma2 = zeros(n, 1);
```

```
for i = 1:n
    mu(i) = mean(train(:,i));
    sigma2(i) = var(train(:,i));
end
```

```
% Train algorithm
```

```
k = length(mu);
```

```
if (size(sigma2, 2) == 1) || (size(sigma2, 1) == 1)
    sigma2 = diag(sigma2);
end
```

```
train = bsxfun(@minus, train, mu(:)');
p = (2 * pi) ^ (- k / 2) * det(sigma2) ^ (-0.5) * ...
    exp(-0.5 * sum(bsxfun(@times, train * pinv(sigma2), train), 2));
```

```
% Determine epsilon based on 5% of training data
```

```
[min,index]=sort(p);
epsilon = min(round(0.05*m));
```

```
% Determine p for new run
```

```
pval = multivariateGaussian(test, mu, sigma2);
```

```
% Predict anomalies in test set based on data from train
```

```
%Anomaly = 1, Normal = 0
```

```
for i = 1:mm
    predictions(i) = (pval(i) < epsilon);
end
```

```
% Calculate the total number of anomalies in test set
```

```
anomalies = sum(predictions == 1);
```

```
percent_similar = (mm-anomalies)/mm*100;
```

```
end
```
