# Supplementary material for: New Considerations for Collecting Biomechanical Data Using Wearable Sensors: How Does Inclination Influence the Number of Runs Needed to Determine a Stable Running Gait Pattern?
Source: Sensors (Basel). 2019 Jun 1;19(11):2516. doi: 10.3390/s19112516 (PMC6603692; doi:10.3390/s19112516)
Supplement: Supplementary file 1 [file sensors-19-02516-s001.zip › Suppl/Sample Data From Garmin Wearable.csv]

record.timestamp[s]	record.position_lat[semicircles]	record.position_long[semicircles]	record.distance[m]	record.altitude[m]	record.speed[m/s]
857058374	609066685	-1361105707	1228.27	1046.8	1.194
857058375	609066600	-1361106058	1230.47	1046.8	1.512
857058376	609066538	-1361106430	1232.73	1046.8	1.829
857058377	609066476	-1361106818	1235.08	1046.6	2.053
857058378	609066423	-1361107171	1237.22	1046.6	2.137
857058379	609066370	-1361107532	1239.39	1046.6	2.183
857058380	609066307	-1361107873	1241.48	1046.4	2.193
857058381	609066253	-1361108228	1243.62	1046.4	2.202
857058382	609066188	-1361108574	1245.74	1046.4	2.221
857058383	609066138	-1361108901	1247.72	1046.4	2.221
857058384	609066082	-1361109272	1249.96	1046.4	2.211
857058385	609065996	-1361109653	1252.33	1046.6	2.211
857058386	609065926	-1361110006	1254.51	1046.6	2.23
857058387	609065854	-1361110381	1256.81	1046.6	2.23
857058388	609065806	-1361110744	1258.99	1046.6	2.23
857058389	609065744	-1361111131	1261.34	1046.8	2.23
857058390	609065645	-1361111536	1263.89	1046.8	2.239
857058391	609065535	-1361111931	1266.42	1046.8	2.267
857058392	609065435	-1361112263	1268.59	1046.8	2.286
857058393	609065358	-1361112610	1270.75	1046.8	2.305
857058394	609065285	-1361112979	1273.01	1046.8	2.305
857058395	609065212	-1361113345	1275.27	1046.8	2.323
857058396	609065133	-1361113717	1277.57	1046.8	2.333
857058397	609065092	-1361114075	1279.71	1046.8	2.333
857058398	609065050	-1361114429	1281.82	1046.8	2.333
857058399	609064985	-1361114757	1283.84	1046.8	2.323
857058400	609064920	-1361115084	1285.86	1046.8	2.314
857058401	609064821	-1361115468	1288.3	1046.6	2.305
857058402	609064745	-1361115833	1290.55	1046.6	2.314
857058403	609064682	-1361116195	1292.76	1046.6	2.314
857058404	609064636	-1361116543	1294.85	1046.6	2.314
857058405	609064579	-1361116906	1297.04	1046.6	2.305
857058406	609064502	-1361117262	1299.26	1046.6	2.305
857058407	609064424	-1361117618	1301.47	1046.6	2.295
857058408	609064347	-1361117972	1303.67	1046.6	2.295
857058409	609064299	-1361118290	1305.59	1046.6	2.295
857058410	609064218	-1361118609	1307.62	1046.6	2.286
857058411	609064146	-1361118957	1309.76	1046.6	2.277
857058412	609064057	-1361119317	1312.03	1046.6	2.277
857058413	609063965	-1361119673	1314.29	1046.6	2.277
857058414	609063889	-1361119995	1316.3	1046.6	2.277
857058415	609063829	-1361120314	1318.26	1046.6	2.267
857058416	609063753	-1361120646	1320.33	1046.6	2.267
857058417	609063691	-1361120993	1322.44	1046.6	2.267
857058418	609063664	-1361121356	1324.59	1046.6	2.258
857058419	609063713	-1361121718	1326.77	1046.6	2.258
857058420	609063840	-1361122026	1328.93	1046.6	2.258
857058421	609064005	-1361122328	1331.28	1046.6	2.258
857058422	609064133	-1361122647	1333.5	1046.6	2.258
857058423	609064274	-1361122969	1335.81	1046.6	2.258
857058424	609064412	-1361123292	1338.1	1046.6	2.258
857058425	609064555	-1361123579	1340.24	1046.6	2.258
857058426	609064696	-1361123905	1342.57	1046.6	2.258
857058427	609064804	-1361124255	1344.84	1046.6	2.267
857058428	609064903	-1361124608	1347.11	1046.4	2.267
857058429	609064987	-1361124976	1349.4	1046.4	2.267
857058430	609065059	-1361125361	1351.75	1046.4	2.267
857058431	609065105	-1361125750	1354.07	1046.4	2.277
857058432	609065138	-1361126141	1356.39	1046.4	2.277
857058433	609065135	-1361126530	1358.67	1046.4	2.286
857058434	609065102	-1361126924	1361	1046.4	2.286
857058435	609065059	-1361127312	1363.32	1046.4	2.286
857058436	609065018	-1361127702	1365.65	1046.4	2.286
857058437	609064960	-1361128078	1367.92	1046.4	2.286
857058438	609064885	-1361128445	1370.18	1046.4	2.286
857058439	609064806	-1361128775	1372.25	1046.4	2.286
857058440	609064737	-1361129102	1374.27	1046.4	2.277
857058441	609064635	-1361129449	1376.52	1046.4	2.277
857058442	609064532	-1361129798	1378.79	1046.4	2.277
857058443	609064462	-1361130153	1380.97	1046.4	2.267
857058444	609064409	-1361130504	1383.09	1046.4	2.267
857058445	609064343	-1361130874	1385.35	1046.4	2.267
857058446	609064241	-1361131235	1387.68	1046.4	2.267
857058447	609064147	-1361131582	1389.89	1046.4	2.267
857058448	609064074	-1361131948	1392.15	1046.4	2.258
857058449	609063997	-1361132328	1394.49	1046.4	2.258
857058450	609063915	-1361132687	1396.73	1046.4	2.258
857058451	609063834	-1361133024	1398.85	1046.4	2.258
857058452	609063779	-1361133350	1400.83	1046.6	2.258
857058453	609063683	-1361133665	1402.88	1046.6	2.249
857058454	609063638	-1361133996	1404.85	1046.6	2.249
857058455	609063552	-1361134320	1406.92	1046.6	2.239
857058456	609063464	-1361134650	1409.02	1046.6	2.23
857058457	609063383	-1361134993	1411.17	1046.6	2.23
857058458	609063306	-1361135324	1413.24	1046.8	2.221
857058459	609063226	-1361135690	1415.52	1046.6	2.221
857058460	609063146	-1361136044	1417.73	1046.6	2.221
857058461	609063096	-1361136371	1419.7	1046.6	2.221
857058462	609062981	-1361136732	1422.07	1046.6	2.221
857058463	609062885	-1361137068	1424.24	1046.6	2.221
857058464	609062813	-1361137421	1426.42	1046.8	2.211
857058465	609062732	-1361137785	1428.69	1046.8	2.211
857058466	609062629	-1361138171	1431.15	1046.8	2.221
857058467	609062596	-1361138541	1433.25	1046.8	2.221
857058468	609062521	-1361138917	1435.56	1046.8	2.221
857058469	609062463	-1361139307	1437.92	1046.8	2.23
857058470	609062390	-1361139697	1440.31	1046.8	2.23
857058471	609062323	-1361140083	1442.64	1046.8	2.23
857058472	609062286	-1361140463	1444.87	1046.8	2.239
857058473	609062246	-1361140820	1446.96	1046.8	2.239
857058474	609062193	-1361141203	1449.26	1046.8	2.239
857058475	609062161	-1361141586	1451.49	1046.8	2.239
857058476	609062108	-1361141986	1453.89	1046.8	2.239
857058477	609062066	-1361142356	1456.07	1046.8	2.249
857058478	609061999	-1361142721	1458.29	1046.8	2.249
857058479	609061929	-1361143090	1460.55	1046.8	2.249
857058480	609061838	-1361143447	1462.81	1046.8	2.249
857058481	609061786	-1361143814	1464.99	1046.8	2.249
857058482	609061725	-1361144153	1467.04	1046.8	2.249
857058483	609061697	-1361144482	1468.94	1046.8	2.249
857058484	609061618	-1361144842	1471.18	1046.8	2.239
857058485	609061537	-1361145161	1473.18	1047	2.239
857058486	609061475	-1361145484	1475.16	1047	2.23
857058487	609061412	-1361145832	1477.29	1047	2.23
857058488	609061349	-1361146189	1479.47	1047	2.23
857058489	609061252	-1361146527	1481.65	1047	2.23
857058490	609061159	-1361146861	1483.8	1047	2.221
857058491	609061088	-1361147196	1485.87	1047	2.221
857058492	609060986	-1361147526	1488.03	1047	2.221
857058493	609060936	-1361147854	1490	1047	2.221
857058494	609060854	-1361148190	1492.12	1047	2.211
857058495	609060760	-1361148541	1494.36	1047	2.211
857058496	609060652	-1361148884	1496.61	1047	2.211
857058497	609060556	-1361149216	1498.76	1047	2.211
857058498	609060461	-1361149582	1501.08	1047	2.211
857058499	609060367	-1361149960	1503.47	1047	2.211
857058500	609060293	-1361150332	1505.75	1047	2.221
857058501	609060199	-1361150694	1508.05	1047	2.221
857058502	609060120	-1361151063	1510.33	1047	2.221
857058503	609060005	-1361151403	1512.6	1047	2.221
857058504	609059913	-1361151755	1514.83	1047	2.221
857058505	609059814	-1361152107	1517.1	1047	2.23
857058506	609059733	-1361152450	1519.25	1047	2.23
857058507	609059644	-1361152801	1521.47	1047	2.23
857058508	609059560	-1361153155	1523.69	1047	2.23
857058509	609059477	-1361153515	1525.94	1047	2.23
857058510	609059389	-1361153853	1528.08	1047	2.23
857058511	609059305	-1361154186	1530.19	1047	2.23
857058512	609059231	-1361154526	1532.3	1047	2.221
857058513	609059170	-1361154865	1534.36	1047.2	2.221
857058514	609059112	-1361155205	1536.42	1047.2	2.221
857058515	609059038	-1361155553	1538.56	1047.2	2.221
857058516	609058961	-1361155917	1540.8	1047.2	2.221
857058517	609058879	-1361156287	1543.09	1047.2	2.221
857058518	609058810	-1361156643	1545.27	1047.2	2.221
857058519	609058711	-1361156986	1547.48	1047.2	2.221
857058520	609058638	-1361157362	1549.77	1047.2	2.221
857058521	609058601	-1361157707	1551.76	1047.2	2.221
857058522	609058505	-1361158038	1553.89	1047.2	2.221
857058523	609058420	-1361158374	1556.01	1047.2	2.221
857058524	609058322	-1361158733	1558.31	1047.2	2.221
857058525	609058251	-1361159093	1560.52	1047.2	2.221
857058526	609058173	-1361159444	1562.7	1047.2	2.221
857058527	609058120	-1361159789	1564.77	1047.2	2.221
857058528	609058055	-1361160126	1566.84	1047.2	2.221
857058529	609058028	-1361160488	1568.93	1047.2	2.221
857058530	609058001	-1361160837	1570.91	1047.2	2.211
857058531	609057910	-1361161185	1573.12	1047.2	2.211
857058532	609057805	-1361161538	1575.41	1047.2	2.211
857058533	609057736	-1361161863	1577.42	1047.2	2.211
857058534	609057684	-1361162193	1579.42	1047.2	2.211
857058535	609057619	-1361162490	1581.27	1047.2	2.202
857058536	609057542	-1361162861	1583.55	1047.2	2.202
857058537	609057423	-1361163202	1585.84	1047.2	2.202
857058538	609057304	-1361163535	1588.09	1047.2	2.202
857058539	609057189	-1361163883	1590.38	1047.2	2.202
857058540	609057069	-1361164222	1592.64	1047.4	2.202
857058541	609056901	-1361164547	1595.12	1047.4	2.202
857058542	609056764	-1361164891	1597.5	1047.4	2.211
857058543	609056623	-1361165255	1600	1047.4	2.211
857058544	609056493	-1361165585	1602.28	1047.4	2.221
857058545	609056351	-1361165915	1604.63	1047.4	2.221
857058546	609056229	-1361166234	1606.82	1047.4	2.221
857058547	609056091	-1361166558	1609.11	1047.4	2.221
857058548	609055928	-1361166886	1611.57	1047.6	2.221
857058549	609055747	-1361167194	1614.04	1047.6	2.23
857058550	609055563	-1361167516	1616.59	1047.6	2.23
857058551	609055395	-1361167843	1619.07	1047.6	2.23
857058552	609055188	-1361168154	1621.73	1047.6	2.239
857058553	609055007	-1361168436	1624.09	1047.6	2.249
857058554	609054846	-1361168730	1626.38	1047.6	2.249
857058555	609054679	-1361169000	1628.6	1047.6	2.249
857058556	609054522	-1361169255	1630.69	1047.8	2.249
857058557	609054374	-1361169498	1632.68	1047.8	2.249
857058558	609054214	-1361169738	1634.73	1047.8	2.249
857058559	609054064	-1361170006	1636.82	1047.8	2.249
857058560	609053900	-1361170275	1639.01	1047.8	2.249
857058561	609053723	-1361170553	1641.34	1047.8	2.249
857058562	609053542	-1361170822	1643.64	1047.8	2.249
857058563	609053365	-1361171087	1645.91	1047.8	2.249
857058564	609053158	-1361171332	1648.32	1047.8	2.249
857058565	609052930	-1361171544	1650.78	1047.8	2.249
857058566	609052689	-1361171741	1653.31	1048	2.249
857058567	609052450	-1361171955	1655.86	1048	2.249
857058568	609052203	-1361172163	1658.48	1048	2.258
857058569	609051952	-1361172378	1661.14	1048	2.258
857058570	609051711	-1361172598	1663.72	1048	2.258
857058571	609051491	-1361172819	1666.16	1048	2.267
857058572	609051301	-1361173031	1668.32	1048	2.267
857058573	609051098	-1361173262	1670.65	1048	2.267
857058574	609050896	-1361173481	1672.93	1048	2.267
857058575	609050718	-1361173675	1674.94	1048.2	2.267
857058576	609050535	-1361173874	1676.99	1048.2	2.258
857058577	609050344	-1361174104	1679.23	1048.2	2.258
857058578	609050162	-1361174337	1681.41	1048.2	2.258
857058579	609049974	-1361174571	1683.64	1048	2.258
857058580	609049789	-1361174779	1685.74	1048	2.258
857058581	609049635	-1361174975	1687.59	1048	2.258
857058582	609049490	-1361175170	1689.34	1048.2	2.249
857058583	609049346	-1361175397	1691.25	1048.2	2.249
857058584	609049213	-1361175615	1693.03	1048.4	2.239
857058585	609049108	-1361175783	1694.42	1048.4	2.23
857058586	609049003	-1361175950	1695.8	1048.4	2.221
857058587	609048864	-1361176154	1697.56	1048.4	2.202
857058588	609048702	-1361176407	1699.68	1048.4	2.193
857058589	609048532	-1361176643	1701.78	1048.4	2.193
857058590	609048357	-1361176898	1704	1048.4	2.193
857058591	609048155	-1361177158	1706.42	1048.4	2.193
857058592	609047973	-1361177381	1708.57	1048.4	2.193
857058593	609047766	-1361177628	1710.98	1048.4	2.193
857058594	609047558	-1361177883	1713.44	1048.4	2.193
857058595	609047377	-1361178138	1715.69	1048.4	2.193
857058596	609047162	-1361178440	1718.37	1048.4	2.193
857058597	609046959	-1361178698	1720.79	1048.4	2.202
857058598	609046737	-1361178957	1723.36	1048.4	2.202
857058599	609046534	-1361179215	1725.79	1048.4	2.202
857058600	609046299	-1361179526	1728.64	1048.4	2.211
857058601	609046088	-1361179816	1731.25	1048.4	2.211
857058602	609045899	-1361180108	1733.7	1048.4	2.221
857058603	609045732	-1361180437	1736.16	1048.2	2.221
857058604	609045525	-1361180740	1738.79	1048.2	2.23
857058605	609045301	-1361181060	1741.6	1048.2	2.23
857058606	609045108	-1361181381	1744.19	1048.2	2.239
857058607	609044901	-1361181685	1746.81	1048.2	2.249
857058608	609044696	-1361181953	1749.29	1048.2	2.249
857058609	609044526	-1361182222	1751.52	1048.2	2.258
857058610	609044348	-1361182505	1753.87	1048.2	2.258
857058611	609044170	-1361182796	1756.26	1048.4	2.258
857058612	609043998	-1361183062	1758.48	1048.4	2.258
857058613	609043819	-1361183315	1760.72	1048.4	2.258
857058614	609043664	-1361183574	1762.81	1048.4	2.258
857058615	609043492	-1361183818	1764.96	1048.4	2.258
857058616	609043318	-1361184057	1767.11	1048.4	2.258
857058617	609043149	-1361184278	1769.15	1048.4	2.258
857058618	609042973	-1361184506	1771.27	1048.4	2.258
857058619	609042778	-1361184779	1773.69	1048.6	2.258
857058620	609042558	-1361185084	1776.41	1048.6	2.258
857058621	609042327	-1361185371	1779.15	1048.6	2.267
857058622	609042105	-1361185665	1781.85	1048.6	2.267
857058623	609041904	-1361185942	1784.33	1048.6	2.277
857058624	609041688	-1361186230	1786.96	1048.6	2.277
857058625	609041487	-1361186497	1789.41	1048.6	2.286
857058626	609041309	-1361186743	1791.6	1048.6	2.286
857058627	609041144	-1361187001	1793.75	1048.6	2.295
857058628	609040947	-1361187261	1796.14	1048.6	2.295
857058629	609040805	-1361187537	1798.18	1048.6	2.295
857058630	609040671	-1361187794	1800.14	1048.6	2.295
857058631	609040501	-1361188084	1802.46	1048.6	2.295
857058632	609040314	-1361188330	1804.7	1048.6	2.305
857058633	609040150	-1361188602	1806.91	1048.6	2.305
857058634	609039974	-1361188885	1809.25	1048.6	2.305
857058635	609039821	-1361189164	1811.42	1048.6	2.305
857058636	609039629	-1361189460	1813.88	1048.6	2.305
857058637	609039440	-1361189769	1816.41	1048.8	2.342
857058638	609039326	-1361190075	1818.4	1048.8	2.342
857058639	609039175	-1361190365	1820.61	1048.8	2.333
857058640	609039023	-1361190634	1822.72	1048.8	2.221
857058641	609038866	-1361190891	1824.83	1048.8	2.211
857058642	609038723	-1361191178	1826.98	1048.8	2.165
857058643	609038586	-1361191475	1829.14	1048.8	2.165
857058644	609038438	-1361191753	1831.26	1048.8	2.146
857058645	609038278	-1361192025	1833.45	1048.8	2.211
857058646	609038118	-1361192313	1835.7	1048.8	2.211
857058647	609037958	-1361192607	1837.99	1048.8	2.267
857058648	609037803	-1361192912	1840.28	1049	2.305
857058649	609037641	-1361193191	1842.51	1049	2.314
857058650	609037473	-1361193472	1844.78	1049.2	2.305
857058651	609037313	-1361193758	1847.03	1049.2	2.305
857058652	609037144	-1361194057	1849.39	1049.4	2.305
857058653	609036969	-1361194344	1851.73	1049.4	2.305
857058654	609036815	-1361194638	1853.98	1049.4	2.305
857058655	609036669	-1361194902	1856.04	1049.4	2.305
857058656	609036519	-1361195168	1858.13	1049.6	2.295
857058657	609036369	-1361195454	1860.32	1049.6	2.286
857058658	609036217	-1361195768	1862.64	1049.6	2.286
857058659	609036060	-1361196097	1865.07	1049.6	2.295
857058660	609035929	-1361196426	1867.35	1049.8	2.295
857058661	609035822	-1361196756	1869.52	1049.8	2.295
857058662	609035722	-1361197088	1871.68	1050	2.295
857058663	609035638	-1361197447	1873.93	1050	2.295
857058664	609035555	-1361197831	1876.32	1050.2	2.295
857058665	609035470	-1361198183	1878.52	1050.2	2.295
857058666	609035409	-1361198534	1880.67	1050.2	2.286
857058667	609035333	-1361198917	1883.02	1050.4	2.286
857058668	609035264	-1361199302	1885.38	1050.4	2.286
857058669	609035192	-1361199677	1887.68	1050.4	2.286
857058670	609035119	-1361200030	1889.87	1050.4	2.286
857058671	609035027	-1361200370	1892.04	1050.4	2.286
857058672	609034920	-1361200622	1893.82	1050.4	2.286
857058673	609034882	-1361200957	1895.8	1050.4	2.277
857058674	609034843	-1361201366	1898.23	1050.4	2.277
857058675	609034783	-1361201803	1900.86	1050.4	2.277
857058676	609034705	-1361202283	1903.77	1050.2	2.277
857058677	609034631	-1361202795	1906.86	1050.2	2.286
857058678	609034580	-1361203311	1909.92	1050.2	2.286
857058679	609034527	-1361203812	1912.91	1050	2.295
857058680	609034547	-1361204179	1915.02	1050	2.295
857058681	609034573	-1361204473	1916.71	1049.8	2.295
857058682	609034627	-1361204802	1918.64	1049.8	2.295
857058683	609034786	-1361205106	1920.57	1049.6	2.295
857058684	609034834	-1361205270	1921.36	1049.6	2.295
857058685	609034896	-1361205525	1922.85	1049.6	2.286
857058686	609034928	-1361205860	1924.84	1049.6	2.286
857058687	609034986	-1361206306	1927.51	1049.6	2.286
857058688	609035072	-1361206690	1929.91	1049.6	2.277
857058689	609035220	-1361207038	1932.3	1049.6	2.277
857058690	609035365	-1361207381	1934.69	1049.6	2.277
857058691	609035444	-1361207792	1937.22	1049.6	2.277
857058692	609035572	-1361208206	1939.87	1049.6	2.277
857058693	609035680	-1361208633	1942.56	1049.8	2.286
857058694	609035809	-1361209058	1945.27	1050	2.295
857058695	609035860	-1361209487	1947.83	1050	2.295
857058696	609035976	-1361209918	1950.58	1050.2	2.305
857058697	609036062	-1361210355	1953.26	1050.2	2.323
857058698	609036118	-1361210788	1955.85	1050.4	2.333
857058699	609036209	-1361211200	1958.41	1050.4	2.342
857058700	609036283	-1361211605	1960.89	1050.4	2.351
857058701	609036353	-1361212005	1963.32	1050.4	2.351
857058702	609036400	-1361212429	1965.85	1050.4	2.351
857058703	609036445	-1361212854	1968.38	1050.4	2.361
857058704	609036481	-1361213303	1971.04	1050.4	2.37
857058705	609036522	-1361213748	1973.68	1050.4	2.379
857058706	609036547	-1361214178	1976.22	1050.4	2.389
857058707	609036519	-1361214621	1978.81	1050.2	2.389
857058708	609036526	-1361215026	1981.19	1050.2	2.398
857058709	609036530	-1361215435	1983.59	1050	2.398
857058710	609036533	-1361215846	1986	1050	2.398
857058711	609036533	-1361216267	1988.48	1049.8	2.398
857058712	609036533	-1361216685	1990.93	1049.8	2.407
857058713	609036538	-1361217116	1993.46	1049.8	2.407
857058714	609036509	-1361217527	1995.88	1049.8	2.407
857058715	609036510	-1361217916	1998.17	1049.8	2.407
857058716	609036510	-1361218303	2000.43	1049.8	2.407
857058717	609036541	-1361218689	2002.71	1049.8	2.407
857058718	609036526	-1361219095	2005.1	1049.8	2.407
857058719	609036530	-1361219519	2007.6	1049.8	2.407
857058720	609036556	-1361219923	2009.98	1049.8	2.407
857058721	609036548	-1361220280	2012.07	1049.6	2.407
857058722	609036556	-1361220633	2014.15	1049.6	2.398
857058723	609036534	-1361221020	2016.43	1049.4	2.398
857058724	609036521	-1361221431	2018.85	1049.4	2.398
857058725	609036521	-1361221820	2021.13	1049.2	2.398
857058726	609036497	-1361222216	2023.47	1049.2	2.389
857058727	609036474	-1361222620	2025.85	1049.2	2.389
857058728	609036448	-1361223028	2028.26	1049.2	2.389
857058729	609036445	-1361223451	2030.75	1049.2	2.389
857058730	609036404	-1361223868	2033.23	1049.2	2.389
857058731	609036380	-1361224270	2035.6	1049.2	2.389
857058732	609036386	-1361224653	2037.85	1049.2	2.389
857058733	609036375	-1361225063	2040.26	1049.2	2.389
857058734	609036340	-1361225478	2042.71	1049.2	2.389
857058735	609036329	-1361225894	2045.16	1049.2	2.389
857058736	609036357	-1361226305	2047.59	1049.2	2.389
857058737	609036362	-1361226725	2050.06	1049.2	2.389
857058738	609036335	-1361227142	2052.51	1049.2	2.398
857058739	609036317	-1361227542	2054.87	1049.2	2.398
857058740	609036300	-1361227924	2057.12	1049.2	2.389
857058741	609036272	-1361228324	2059.48	1049.2	2.389
857058742	609036260	-1361228734	2061.89	1049.2	2.389
857058743	609036256	-1361229136	2064.25	1049.4	2.389
857058744	609036254	-1361229544	2066.65	1049.4	2.389
857058745	609036271	-1361229956	2069.08	1049.4	2.389
857058746	609036291	-1361230380	2071.57	1049.4	2.389
857058747	609036294	-1361230806	2074.08	1049.4	2.398
857058748	609036255	-1361231229	2076.58	1049.4	2.398
857058749	609036251	-1361231638	2078.98	1049.6	2.398
857058750	609036183	-1361232031	2081.36	1049.6	2.398
857058751	609036115	-1361232428	2083.77	1049.6	2.398
857058752	609036040	-1361232840	2086.29	1049.6	2.398
857058753	609035998	-1361233238	2088.66	1049.6	2.398
857058754	609035952	-1361233662	2091.18	1049.6	2.398
857058755	609035924	-1361234073	2093.61	1049.6	2.407
857058756	609035911	-1361234484	2096.03	1049.6	2.407
857058757	609035871	-1361234880	2098.38	1049.6	2.407
857058758	609035851	-1361235269	2100.67	1049.6	2.407
857058759	609035822	-1361235660	2102.97	1049.6	2.407
857058760	609035814	-1361236043	2105.23	1049.6	2.398
857058761	609035815	-1361236431	2107.51	1049.6	2.398
857058762	609035851	-1361236812	2109.75	1049.6	2.398
857058763	609035861	-1361237223	2112.17	1049.6	2.398
857058764	609035885	-1361237648	2114.66	1049.6	2.398
857058765	609035870	-1361238063	2117.1	1049.6	2.398
857058766	609035891	-1361238484	2119.57	1049.6	2.398
857058767	609035909	-1361238916	2122.12	1049.6	2.407
857058768	609035929	-1361239321	2124.5	1049.6	2.407
857058769	609035929	-1361239713	2126.8	1049.6	2.407
857058770	609035937	-1361240097	2129.06	1049.6	2.398
857058771	609035935	-1361240472	2131.26	1049.6	2.398
857058772	609035951	-1361240879	2133.65	1049.6	2.398
857058773	609035968	-1361241278	2135.98	1049.4	2.398
857058774	609035980	-1361241703	2138.48	1049.4	2.398
857058775	609035967	-1361242134	2141	1049.4	2.398
857058776	609035952	-1361242559	2143.51	1049.4	2.398
857058777	609035938	-1361242978	2145.96	1049.4	2.407
857058778	609035925	-1361243381	2148.34	1049.4	2.407
857058779	609035906	-1361243793	2150.76	1049.6	2.407
857058780	609035894	-1361244211	2153.22	1049.6	2.407
857058781	609035881	-1361244621	2155.64	1049.6	2.407
857058782	609035844	-1361245023	2158.02	1049.6	2.407
857058783	609035824	-1361245424	2160.38	1049.8	2.407
857058784	609035802	-1361245792	2162.55	1049.8	2.407
857058785	609035767	-1361246163	2164.75	1049.8	2.398
857058786	609035711	-1361246515	2166.89	1049.8	2.398
857058787	609035625	-1361246886	2169.21	1049.8	2.398
857058788	609035499	-1361247242	2171.6	1049.8	2.389
857058789	609035410	-1361247606	2173.89	1050	2.389
857058790	609035319	-1361247967	2176.18	1050.2	2.389
857058791	609035241	-1361248313	2178.34	1050.2	2.389
857058792	609035179	-1361248681	2180.57	1050.2	2.379
857058793	609035116	-1361249059	2182.87	1050.2	2.379
857058794	609035086	-1361249427	2185.05	1050.4	2.379
857058795	609035043	-1361249806	2187.31	1050.6	2.37
857058796	609035016	-1361250165	2189.44	1050.6	2.37
857058797	609034980	-1361250558	2191.77	1050.8	2.361
857058798	609034988	-1361250951	2194.08	1050.8	2.361
857058799	609034984	-1361251359	2196.47	1050.8	2.361
857058800	609034989	-1361251778	2198.94	1050.8	2.361
857058801	609035013	-1361252218	2201.53	1050.8	2.361
857058802	609035024	-1361252650	2204.08	1051	2.37
857058803	609035056	-1361253068	2206.55	1051	2.37
857058804	609035060	-1361253495	2209.06	1051	2.37
857058805	609035064	-1361253916	2211.53	1051	2.37
857058806	609035045	-1361254338	2214.02	1051.2	2.379
857058807	609035042	-1361254739	2216.37	1051.2	2.379
857058808	609035010	-1361255130	2218.69	1051.2	2.379
857058809	609034975	-1361255533	2221.08	1051.2	2.379
857058810	609034997	-1361255958	2223.58	1051.2	2.379
857058811	609034992	-1361256357	2225.92	1051.2	2.379
857058812	609034997	-1361256769	2228.34	1051.2	2.379
857058813	609034964	-1361257178	2230.76	1051.2	2.379
857058814	609034903	-1361257615	2233.36	1051.2	2.379
857058815	609034869	-1361258026	2235.79	1051.2	2.389
857058816	609034878	-1361258424	2238.13	1051.4	2.389
857058817	609034897	-1361258816	2240.44	1051.4	2.379
857058818	609034913	-1361259204	2242.72	1051.4	2.379
857058819	609034950	-1361259639	2245.3	1051.4	2.379
857058820	609034997	-1361260046	2247.71	1051.4	2.389
857058821	609035041	-1361260453	2250.13	1051.4	2.389
857058822	609035083	-1361260843	2252.46	1051.4	2.389
857058823	609035147	-1361261244	2254.89	1051.4	2.389
857058824	609035172	-1361261661	2257.35	1051.4	2.389
857058825	609035213	-1361262064	2259.75	1051.4	2.389
857058826	609035226	-1361262482	2262.21	1051.4	2.389
857058827	609035230	-1361262893	2264.62	1051.6	2.389
857058828	609035237	-1361263318	2267.12	1051.6	2.389
857058829	609035232	-1361263729	2269.53	1051.6	2.398
857058830	609035233	-1361264155	2272.04	1051.6	2.398
857058831	609035226	-1361264571	2274.48	1051.6	2.398
857058832	609035242	-1361264987	2276.93	1051.6	2.398
857058833	609035225	-1361265422	2279.49	1051.4	2.398
857058834	609035177	-1361265849	2282.04	1051.4	2.407
857058835	609035131	-1361266238	2284.37	1051.4	2.407
857058836	609035132	-1361266623	2286.63	1051.4	2.407
857058837	609035142	-1361267027	2289.01	1051.2	2.407
857058838	609035174	-1361267441	2291.45	1051.2	2.407
857058839	609035218	-1361267856	2293.92	1051.2	2.407
857058840	609035235	-1361268262	2296.31	1051.2	2.407
857058841	609035230	-1361268673	2298.72	1051.2	2.407
857058842	609035232	-1361269111	2301.29	1051.4	2.407
857058843	609035221	-1361269555	2303.9	1051.4	2.407
857058844	609035233	-1361270018	2306.63	1051.6	2.407
857058845	609035247	-1361270456	2309.2	1051.6	2.417
857058846	609035256	-1361270881	2311.7	1051.6	2.417
857058847	609035269	-1361271289	2314.1	1051.8	2.417
857058848	609035294	-1361271660	2316.29	1051.8	2.417
857058849	609035298	-1361272074	2318.71	1051.8	2.417
857058850	609035333	-1361272458	2320.99	1051.8	2.417
857058851	609035385	-1361272843	2323.3	1051.8	2.417
857058852	609035439	-1361273250	2325.74	1051.8	2.417
857058853	609035487	-1361273658	2328.18	1051.8	2.417
857058854	609035558	-1361274062	2330.64	1051.8	2.417
857058855	609035607	-1361274447	2332.94	1052	2.417
857058856	609035610	-1361274851	2335.31	1052	2.417
857058857	609035598	-1361275241	2337.61	1052	2.417
857058858	609035605	-1361275650	2340	1052.2	2.417
857058859	609035632	-1361276059	2342.42	1052.2	2.417
857058860	609035652	-1361276473	2344.86	1052.2	2.417
857058861	609035679	-1361276857	2347.13	1052.2	2.417
857058862	609035683	-1361277259	2349.49	1052.2	2.417
857058863	609035704	-1361277684	2352	1052.2	2.417
857058864	609035748	-1361278102	2354.48	1052.2	2.417
857058865	609035792	-1361278528	2357.02	1052.2	2.417
857058866	609035813	-1361278937	2359.44	1052.2	2.417
857058867	609035832	-1361279348	2361.85	1052.2	2.417
857058868	609035866	-1361279776	2364.38	1052.2	2.417
857058869	609035893	-1361280198	2366.87	1052.2	2.417
857058870	609035916	-1361280620	2369.36	1052.2	2.417
857058871	609035910	-1361281035	2371.79	1052.2	2.426
857058872	609035911	-1361281441	2374.17	1052.2	2.426
857058873	609035937	-1361281854	2376.61	1052.2	2.426
857058874	609035944	-1361282277	2379.09	1052	2.426
857058875	609035947	-1361282694	2381.54	1052	2.426
857058876	609035943	-1361283116	2384.02	1052	2.426
857058877	609035941	-1361283537	2386.49	1052	2.426
857058878	609035902	-1361283988	2389.17	1051.8	2.426
857058879	609035839	-1361284430	2391.82	1051.8	2.426
857058880	609035786	-1361284858	2394.38	1051.8	2.435
857058881	609035723	-1361285273	2396.89	1051.8	2.435
857058882	609035686	-1361285662	2399.2	1051.8	2.435
857058883	609035668	-1361286043	2401.44	1051.8	2.435
857058884	609035651	-1361286423	2403.68	1052	2.435
857058885	609035665	-1361286834	2406.1	1052	2.435
857058886	609035682	-1361287230	2408.43	1052	2.435
857058887	609035700	-1361287612	2410.68	1052	2.435
857058888	609035684	-1361288004	2412.99	1052	2.426
857058889	609035658	-1361288390	2415.28	1052	2.426
857058890	609035642	-1361288784	2417.59	1052	2.426
857058891	609035656	-1361289194	2419.99	1052	2.426
857058892	609035672	-1361289604	2422.41	1052	2.426
857058893	609035721	-1361290027	2424.93	1052	2.426
857058894	609035786	-1361290455	2427.49	1052	2.426
857058895	609035832	-1361290878	2430.01	1052	2.435
857058896	609035889	-1361291308	2432.58	1052	2.435
857058897	609035921	-1361291722	2435.04	1052.2	2.435
857058898	609035962	-1361292154	2437.6	1052.2	2.445
857058899	609036008	-1361292567	2440.06	1052.2	2.445
857058900	609036054	-1361292979	2442.52	1052.2	2.445
857058901	609036081	-1361293400	2445	1052.2	2.445
857058902	609036116	-1361293808	2447.42	1052.2	2.445
857058903	609036159	-1361294235	2449.96	1052.2	2.445
857058904	609036212	-1361294645	2452.42	1052.4	2.454
857058905	609036228	-1361295036	2454.72	1052.4	2.454
857058906	609036266	-1361295436	2457.09	1052.4	2.454
857058907	609036313	-1361295841	2459.52	1052.4	2.454
857058908	609036350	-1361296244	2461.91	1052.4	2.445
857058909	609036392	-1361296620	2464.15	1052.4	2.445
857058910	609036419	-1361297001	2466.41	1052.4	2.445
857058911	609036454	-1361297391	2468.72	1052.4	2.445
857058912	609036485	-1361297791	2471.09	1052.4	2.435
857058913	609036522	-1361298203	2473.54	1052.4	2.435
857058914	609036554	-1361298630	2476.06	1052.4	2.435
857058915	609036595	-1361299042	2478.51	1052.4	2.435
857058916	609036625	-1361299447	2480.9	1052.4	2.435
857058917	609036634	-1361299847	2483.26	1052.4	2.435
857058918	609036633	-1361300245	2485.59	1052.4	2.435
857058919	609036622	-1361300639	2487.89	1052.4	2.435
857058920	609036629	-1361301036	2490.22	1052.4	2.435
857058921	609036645	-1361301442	2492.61	1052.4	2.426
857058922	609036656	-1361301846	2494.98	1052.4	2.426
857058923	609036661	-1361302250	2497.36	1052.4	2.426
857058924	609036678	-1361302663	2499.79	1052.4	2.426
857058925	609036688	-1361303089	2502.3	1052.4	2.426
857058926	609036707	-1361303483	2504.62	1052.2	2.426
857058927	609036738	-1361303874	2506.93	1052.2	2.426
857058928	609036755	-1361304266	2509.24	1052.2	2.417
857058929	609036768	-1361304636	2511.41	1052.2	2.417
857058930	609036782	-1361304996	2513.53	1052.2	2.407
857058931	609036811	-1361305359	2515.68	1052.2	2.407
857058932	609036840	-1361305734	2517.9	1052.2	2.398
857058933	609036857	-1361306124	2520.19	1052.2	2.398
857058934	609036883	-1361306538	2522.63	1052.2	2.398
857058935	609036895	-1361306944	2525.02	1052.2	2.398
857058936	609036932	-1361307351	2527.44	1052.2	2.398
857058937	609036960	-1361307758	2529.85	1052.2	2.398
857058938	609036982	-1361308157	2532.2	1052.2	2.389
857058939	609036991	-1361308564	2534.59	1052.2	2.389
857058940	609037022	-1361308953	2536.89	1052.2	2.389
857058941	609037073	-1361309353	2539.28	1052.2	2.389
857058942	609037149	-1361309744	2541.68	1052.2	2.389
857058943	609037194	-1361310139	2544.04	1052.2	2.389
857058944	609037250	-1361310545	2546.48	1052.2	2.389
857058945	609037325	-1361310932	2548.84	1052.2	2.389
857058946	609037387	-1361311313	2551.16	1052.2	2.389
857058947	609037461	-1361311708	2553.58	1052.2	2.389
857058948	609037508	-1361312105	2555.95	1052.2	2.389
857058949	609037545	-1361312498	2558.29	1052.2	2.389
857058950	609037586	-1361312890	2560.62	1052.2	2.389
857058951	609037614	-1361313268	2562.85	1052.2	2.389
857058952	609037635	-1361313660	2565.16	1052.2	2.379
857058953	609037662	-1361314037	2567.39	1052.2	2.379
857058954	609037690	-1361314414	2569.62	1052	2.379
857058955	609037725	-1361314796	2571.89	1052	2.379
857058956	609037758	-1361315205	2574.3	1052	2.379
857058957	609037787	-1361315604	2576.67	1052	2.37
857058958	609037825	-1361316001	2579.02	1052	2.37
857058959	609037853	-1361316404	2581.4	1052	2.37
857058960	609037880	-1361316816	2583.84	1052	2.37
857058961	609037921	-1361317228	2586.29	1051.8	2.379
857058962	609037944	-1361317625	2588.63	1051.8	2.379
857058963	609037982	-1361318028	2591.02	1051.8	2.379
857058964	609038015	-1361318439	2593.46	1051.8	2.379
857058965	609038055	-1361318861	2595.97	1051.8	2.379
857058966	609038111	-1361319274	2598.45	1051.8	2.379
857058967	609038144	-1361319673	2600.81	1051.8	2.389
857058968	609038185	-1361320061	2603.12	1051.8	2.389
857058969	609038216	-1361320450	2605.43	1051.8	2.389
857058970	609038264	-1361320816	2607.62	1051.8	2.379
857058971	609038295	-1361321157	2609.64	1051.8	2.379
857058972	609038326	-1361321476	2611.54	1051.8	2.37
857058973	609038350	-1361321739	2613.1	1051.8	2.351
857058974	609038303	-1361321978	2614.55	1051.8	2.099
857058975	609038292	-1361322165	2615.66	1052	1.931
857058976	609038286	-1361322373	2616.87	1051.8	1.614
857058977	609038263	-1361322617	2618.32	1051.8	1.568
857058978	609038260	-1361322849	2619.68	1051.8	1.53
857058979	609038263	-1361323069	2620.96	1052	1.493
857058980	609038272	-1361323285	2622.22	1052	1.465
857058981	609038237	-1361323499	2623.5	1052	1.437
857058982	609038185	-1361323557	2623.5	1052	1.4
857058983	609038217	-1361323464	2624.11	1051.8	0.998
857058984	609038220	-1361323305	2625.03	1051.8	0.998
857058985	609038167	-1361323107	2626.28	1052	1.008
857058986	609038097	-1361322906	2627.56	1052	1.232
857058987	609038054	-1361322674	2628.93	1052	1.325
857058988	609038021	-1361322453	2630.26	1052	1.325
857058989	609037985	-1361322221	2631.64	1051.8	1.39
857058990	609037963	-1361321965	2633.16	1051.8	1.381
857058991	609037930	-1361321721	2634.61	1051.8	1.456
857058992	609037903	-1361321460	2636.16	1051.8	1.484
857058993	609037867	-1361321203	2637.7	1051.8	1.521
857058994	609037822	-1361320963	2639.17	1051.8	1.521
857058995	609037788	-1361320713	2640.67	1051.8	1.512
857058996	609037756	-1361320461	2642.18	1052	1.493
857058997	609037728	-1361320217	2643.64	1052	1.493
857058998	609037694	-1361319967	2645.14	1052	1.493
857058999	609037665	-1361319706	2646.7	1052	1.493
857059000	609037644	-1361319436	2648.29	1052	1.502
857059001	609037625	-1361319174	2649.84	1052	1.502
857059002	609037593	-1361318885	2651.56	1052.2	1.512
857059003	609037567	-1361318632	2653.06	1052.2	1.54
857059004	609037545	-1361318373	2654.6	1052.2	1.54
857059005	609037522	-1361318124	2656.08	1052.2	1.512
857059006	609037497	-1361317881	2657.52	1052.2	1.493
857059007	609037467	-1361317646	2658.92	1052.2	1.474
857059008	609037445	-1361317413	2660.31	1052.2	1.409
857059009	609037419	-1361317174	2661.73	1052.2	1.409
857059010	609037399	-1361316944	2663.1	1052.2	1.409
857059011	609037387	-1361316712	2664.46	1052.2	1.4
857059012	609037371	-1361316473	2665.88	1052.2	1.372
857059013	609037350	-1361316227	2667.34	1052.2	1.4
857059014	609037328	-1361315990	2668.74	1052.2	1.4
857059015	609037307	-1361315757	2670.13	1052.2	1.4
857059016	609037296	-1361315533	2671.45	1052.2	1.362
857059017	609037282	-1361315305	2672.79	1052.2	1.353
857059018	609037262	-1361315076	2674.15	1052.2	1.334
857059019	609037246	-1361314847	2675.51	1052.2	1.334
857059020	609037223	-1361314624	2676.84	1052.2	1.334
857059021	609037196	-1361314416	2678.08	1052.2	1.325
857059022	609037193	-1361314213	2679.26	1052	1.325
857059023	609037243	-1361314048	2680.26	1052	1.325
857059024	609037332	-1361314022	2680.87	1052	1.306
857059025	609037390	-1361314145	2681.73	1052.2	1.297
857059026	609037428	-1361314328	2682.86	1052.2	1.288
857059027	609037457	-1361314532	2684.08	1052.2	1.288
857059028	609037464	-1361314740	2685.31	1052.2	1.288
857059029	609037461	-1361314947	2686.52	1052.2	1.288
857059030	609037483	-1361315158	2687.78	1052.2	1.288
857059031	609037495	-1361315364	2689	1052	1.288
857059032	609037510	-1361315579	2690.27	1052.2	1.278
857059033	609037512	-1361315795	2691.54	1052.2	1.278
857059034	609037512	-1361316049	2693.03	1052.2	1.278
857059035	609037538	-1361316310	2694.58	1052.2	1.288
857059036	609037574	-1361316598	2696.3	1052.2	1.288
857059037	609037595	-1361316907	2698.13	1052.2	1.288
857059038	609037628	-1361317251	2700.16	1052.2	1.297
857059039	609037692	-1361317605	2702.32	1052.2	1.502
857059040	609037754	-1361317974	2704.55	1052.2	1.745
857059041	609037786	-1361318374	2706.92	1052.2	1.941
857059042	609037827	-1361318778	2709.32	1052.2	2.081
857059043	609037868	-1361319180	2711.71	1052.2	2.137
857059044	609037927	-1361319571	2714.07	1052	2.174
857059045	609037973	-1361319962	2716.4	1052	2.193
857059046	609037999	-1361320373	2718.83	1052	2.211
857059047	609038011	-1361320778	2721.22	1052	2.239
857059048	609038025	-1361321168	2723.51	1052	2.258
857059049	609038054	-1361321551	2725.78	1052	2.258
857059050	609038062	-1361321944	2728.09	1052	2.267
857059051	609038078	-1361322340	2730.42	1052	2.277
857059052	609038109	-1361322726	2732.71	1052	2.277
857059053	609038142	-1361323111	2734.99	1052	2.286
857059054	609038144	-1361323513	2737.35	1052.2	2.286
857059055	609038142	-1361323912	2739.69	1052.2	2.295
857059056	609038137	-1361324320	2742.09	1052.4	2.305
857059057	609038131	-1361324712	2744.4	1052.4	2.314
857059058	609038134	-1361325138	2746.9	1052	2.323
857059059	609038151	-1361325576	2749.47	1051.8	2.333
857059060	609038181	-1361326019	2752.09	1051.8	2.351
857059061	609038202	-1361326427	2754.49	1051.8	2.37
857059062	609038199	-1361326834	2756.88	1051.8	2.37
857059063	609038198	-1361327251	2759.33	1051.6	2.37
857059064	609038219	-1361327647	2761.66	1052.2	2.379
857059065	609038232	-1361328053	2764.05	1052	2.379
857059066	609038224	-1361328476	2766.54	1052.2	2.379
857059067	609038208	-1361328897	2769.01	1052	2.379
857059068	609038198	-1361329282	2771.28	1052	2.379
857059069	609038190	-1361329669	2773.55	1051.8	2.379
857059070	609038180	-1361330078	2775.95	1051.6	2.379
857059071	609038211	-1361330488	2778.38	1051.8	2.379
857059072	609038224	-1361330900	2780.8	1051.8	2.379
857059073	609038223	-1361331301	2783.16	1051.8	2.379
857059074	609038226	-1361331712	2785.57	1051.8	2.379
857059075	609038244	-1361332138	2788.08	1051.8	2.379
857059076	609038237	-1361332577	2790.64	1051.8	2.379
857059077	609038237	-1361333023	2793.26	1051.8	2.389
857059078	609038239	-1361333492	2796.02	1051.8	2.389
857059079	609038236	-1361333954	2798.73	1051.8	2.407
857059080	609038227	-1361334414	2801.43	1051.8	2.417
857059081	609038225	-1361334865	2804.08	1051.8	2.426
857059082	609038224	-1361335308	2806.68	1051.8	2.435
857059083	609038250	-1361335724	2809.14	1051.8	2.445
857059084	609038263	-1361336164	2811.72	1051.8	2.445
857059085	609038257	-1361336595	2814.26	1051.8	2.445
857059086	609038249	-1361337032	2816.82	1051.8	2.445
857059087	609038225	-1361337478	2819.44	1051.8	2.445
857059088	609038213	-1361337939	2822.15	1051.8	2.454
857059089	609038210	-1361338393	2824.82	1052	2.463
857059090	609038219	-1361338838	2827.43	1052	2.463
857059091	609038232	-1361339278	2830.02	1052.2	2.463
857059092	609038254	-1361339668	2832.32	1052.2	2.473
857059093	609038267	-1361340025	2834.42	1052.2	2.463
857059094	609038255	-1361340416	2836.71	1052.2	2.463
857059095	609038258	-1361340792	2838.92	1052.2	2.454
857059096	609038255	-1361341184	2841.22	1052.4	2.454
857059097	609038248	-1361341573	2843.51	1052.4	2.445
857059098	609038259	-1361341954	2845.75	1052.4	2.445
857059099	609038313	-1361342305	2847.88	1052.4	2.435
857059100	609038377	-1361342702	2850.28	1052.4	2.435
857059101	609038400	-1361343138	2852.86	1052.4	2.426
857059102	609038379	-1361343599	2855.56	1052.4	2.435
857059103	609038370	-1361344048	2858.19	1052.4	2.435
857059104	609038359	-1361344479	2860.73	1052.4	2.435
857059105	609038335	-1361344891	2863.16	1052.4	2.435
857059106	609038312	-1361345283	2865.47	1052.4	2.435
857059107	609038287	-1361345675	2867.77	1052.6	2.426
857059108	609038266	-1361346069	2870.1	1052.6	2.426
857059109	609038275	-1361346444	2872.3	1052.6	2.417
857059110	609038268	-1361346820	2874.51	1052.6	2.417
857059111	609038254	-1361347213	2876.83	1052.6	2.407
857059112	609038232	-1361347593	2879.07	1052.6	2.407
857059113	609038216	-1361347960	2881.23	1052.6	2.407
857059114	609038210	-1361348321	2883.35	1052.6	2.398
857059115	609038197	-1361348702	2885.57	1052.6	2.389
857059116	609038222	-1361349081	2887.81	1052.8	2.389
857059117	609038246	-1361349475	2890.13	1052.8	2.379
857059118	609038275	-1361349922	2892.77	1052.8	2.379
857059119	609038306	-1361350370	2895.42	1052.8	2.389
857059120	609038332	-1361350796	2897.93	1052.8	2.389
857059121	609038328	-1361351235	2900.51	1052.8	2.389
857059122	609038329	-1361351687	2903.17	1052.8	2.398
857059123	609038329	-1361352102	2905.59	1052.8	2.398
857059124	609038335	-1361352531	2908.1	1052.8	2.398
857059125	609038347	-1361352955	2910.59	1052.8	2.398
857059126	609038356	-1361353379	2913.08	1052.8	2.407
857059127	609038336	-1361353817	2915.66	1052.8	2.407
857059128	609038321	-1361354271	2918.32	1052.8	2.407
857059129	609038308	-1361354685	2920.76	1052.8	2.407
857059130	609038302	-1361355118	2923.3	1052.8	2.407
857059131	609038286	-1361355574	2925.98	1052.8	2.417
857059132	609038284	-1361356043	2928.73	1052.8	2.417
857059133	609038276	-1361356496	2931.39	1052.8	2.426
857059134	609038280	-1361356952	2934.07	1052.8	2.426
857059135	609038274	-1361357386	2936.62	1052.8	2.435
857059136	609038260	-1361357834	2939.25	1052.8	2.435
857059137	609038245	-1361358278	2941.86	1052.8	2.445
857059138	609038263	-1361358701	2944.35	1052.6	2.445
857059139	609038272	-1361359106	2946.73	1052.8	2.445
857059140	609038262	-1361359530	2949.22	1052.8	2.454
857059141	609038216	-1361359975	2951.86	1052.8	2.454
857059142	609038214	-1361360409	2954.41	1052.6	2.454
857059143	609038225	-1361360813	2956.79	1052.8	2.454
857059144	609038247	-1361361215	2959.16	1052.8	2.454
857059145	609038248	-1361361615	2961.51	1052.8	2.454
857059146	609038243	-1361362029	2963.95	1053	2.454
857059147	609038229	-1361362434	2966.33	1053	2.454
857059148	609038219	-1361362846	2968.75	1053	2.454
857059149	609038200	-1361363275	2971.28	1053	2.454
857059150	609038184	-1361363664	2973.57	1053	2.454
857059151	609038182	-1361364059	2975.89	1053	2.454
857059152	609038178	-1361364470	2978.3	1053	2.454
857059153	609038185	-1361364885	2980.74	1053.2	2.454
857059154	609038153	-1361365304	2983.22	1053.2	2.454
857059155	609038114	-1361365724	2985.71	1053.2	2.454
857059156	609038068	-1361366121	2988.08	1053.2	2.454
857059157	609038016	-1361366516	2990.45	1053.2	2.454
857059158	609037954	-1361366912	2992.83	1053.2	2.445
857059159	609037916	-1361367305	2995.17	1053.2	2.445
857059160	609037895	-1361367696	2997.48	1053.2	2.445
857059161	609037869	-1361368097	2999.84	1053.2	2.445
857059162	609037815	-1361368492	3002.22	1053.2	2.445
857059163	609037774	-1361368883	3004.55	1053.2	2.445
857059164	609037726	-1361369288	3006.97	1053.2	2.445
857059165	609037689	-1361369670	3009.24	1053.2	2.445
857059166	609037651	-1361370072	3011.62	1053.4	2.435
857059167	609037586	-1361370472	3014.05	1053.4	2.435
857059168	609037535	-1361370886	3016.52	1053.4	2.435
857059169	609037457	-1361371280	3018.95	1053.4	2.435
857059170	609037392	-1361371679	3021.37	1053.4	2.435
857059171	609037284	-1361372068	3023.85	1053.4	2.435
857059172	609037198	-1361372447	3026.21	1053.4	2.435
857059173	609037081	-1361372815	3028.64	1053.4	2.435
857059174	609036921	-1361373145	3031.08	1053.4	2.435
857059175	609036731	-1361373477	3033.71	1053.6	2.435
857059176	609036547	-1361373800	3036.27	1053.6	2.435
857059177	609036350	-1361374161	3039.07	1053.6	2.435
857059178	609036183	-1361374515	3041.67	1053.6	2.445
857059179	609035986	-1361374894	3044.56	1053.8	2.445
857059180	609035793	-1361375267	3047.4	1053.8	2.454
857059181	609035647	-1361375654	3050.05	1053.8	2.463
857059182	609035522	-1361376036	3052.57	1053.8	2.463
857059183	609035412	-1361376411	3055	1053.8	2.473
857059184	609035292	-1361376769	3057.38	1053.8	2.473
857059185	609035156	-1361377141	3059.91	1053.8	2.473
857059186	609035033	-1361377543	3062.54	1053.8	2.473
857059187	609034917	-1361377961	3065.22	1053.8	2.473
857059188	609034835	-1361378379	3067.78	1053.8	2.473
857059189	609034759	-1361378776	3070.21	1053.6	2.473
857059190	609034662	-1361379172	3072.71	1053.6	2.482
857059191	609034558	-1361379565	3075.21	1053.6	2.482
857059192	609034476	-1361379943	3077.56	1053.6	2.482
857059193	609034363	-1361380323	3080.03	1053.6	2.482
857059194	609034288	-1361380699	3082.33	1053.6	2.482
857059195	609034193	-1361381081	3084.74	1053.4	2.473
857059196	609034121	-1361381467	3087.11	1053.4	2.473
857059197	609034031	-1361381848	3089.5	1053.4	2.473
857059198	609033944	-1361382277	3092.15	1053.4	2.473
857059199	609033860	-1361382712	3094.82	1053.4	2.482
857059200	609033785	-1361383120	3097.31	1053.4	2.482
857059201	609033688	-1361383492	3099.68	1053.4	2.482
857059202	609033590	-1361383857	3102.01	1053.4	2.482
857059203	609033490	-1361384240	3104.44	1053.4	2.482
857059204	609033434	-1361384581	3106.52	1053.2	2.482
857059205	609033381	-1361384921	3108.57	1053.2	2.482
857059206	609033303	-1361385274	3110.76	1053.2	2.473
857059207	609033222	-1361385629	3112.99	1053.2	2.473
857059208	609033121	-1361385974	3115.22	1053.2	2.463
857059209	609033019	-1361386313	3117.43	1053.2	2.463
857059210	609032913	-1361386683	3119.81	1053.2	2.454
857059211	609032803	-1361387053	3122.22	1053.2	2.454
857059212	609032680	-1361387428	3124.7	1053.2	2.454
857059213	609032533	-1361387794	3127.25	1053.2	2.454
857059214	609032394	-1361388171	3129.82	1053.2	2.454
857059215	609032260	-1361388553	3132.38	1053.2	2.463
857059216	609032137	-1361388918	3134.82	1053.2	2.463
857059217	609032005	-1361389295	3137.34	1053.2	2.463
857059218	609031884	-1361389692	3139.94	1053.2	2.463
857059219	609031754	-1361390087	3142.55	1053.2	2.463
857059220	609031628	-1361390468	3145.08	1053.2	2.473
857059221	609031512	-1361390848	3147.56	1053.2	2.473
857059222	609031389	-1361391222	3150.04	1053.2	2.473
857059223	609031268	-1361391580	3152.43	1053.2	2.473
857059224	609031160	-1361391956	3154.85	1053	2.473
857059225	609031053	-1361392324	3157.24	1053	2.473
857059226	609030955	-1361392692	3159.59	1052.8	2.473
857059227	609030856	-1361393076	3162.02	1052.6	2.473
857059228	609030771	-1361393463	3164.43	1052.6	2.473
857059229	609030677	-1361393827	3166.74	1052.8	2.473
857059230	609030560	-1361394189	3169.13	1053	2.473
857059231	609030448	-1361394564	3171.56	1053	2.473
857059232	609030345	-1361394955	3174.05	1053	2.473
857059233	609030228	-1361395352	3176.63	1053	2.473
857059234	609030114	-1361395749	3179.19	1053	2.473
857059235	609030000	-1361396156	3181.81	1052.8	2.473
857059236	609029873	-1361396556	3184.43	1052.8	2.473
857059237	609029738	-1361396957	3187.1	1052.8	2.473
857059238	609029600	-1361397341	3189.71	1052.6	2.473
857059239	609029474	-1361397724	3192.24	1052.6	2.473
857059240	609029343	-1361398111	3194.82	1052.6	2.473
857059241	609029241	-1361398494	3197.26	1052.6	2.473
857059242	609029138	-1361398865	3199.64	1052.6	2.482
857059243	609029030	-1361399258	3202.16	1052.4	2.482
857059244	609028896	-1361399677	3204.93	1052.6	2.482
857059245	609028745	-1361400050	3207.52	1052.6	2.482
857059246	609028632	-1361400419	3209.94	1052.6	2.482
857059247	609028495	-1361400801	3212.52	1052.6	2.491
857059248	609028362	-1361401193	3215.13	1052.6	2.491
857059249	609028255	-1361401584	3217.64	1052.6	2.491
857059250	609028149	-1361401982	3220.18	1052.4	2.491
857059251	609028037	-1361402357	3222.61	1052.2	2.491
857059252	609027958	-1361402746	3225.01	1052.2	2.491
857059253	609027903	-1361403122	3227.28	1052.2	2.491
857059254	609027892	-1361403514	3229.59	1052.2	2.482
857059255	609027902	-1361403930	3232.02	1052	2.482
857059256	609027870	-1361404345	3234.47	1052	2.482
857059257	609027858	-1361404752	3236.87	1052	2.482
857059258	609027839	-1361405142	3239.17	1052	2.473
857059259	609027835	-1361405576	3241.71	1052	2.473
857059260	609027819	-1361406003	3244.23	1052	2.473
857059261	609027826	-1361406426	3246.7	1052	2.473
857059262	609027828	-1361406841	3249.13	1051.8	2.473
857059263	609027831	-1361407242	3251.48	1051.8	2.473
857059264	609027828	-1361407655	3253.9	1051.8	2.473
857059265	609027814	-1361408077	3256.38	1051.8	2.473
857059266	609027807	-1361408513	3258.93	1051.8	2.473
857059267	609027794	-1361408923	3261.34	1052	2.473
857059268	609027803	-1361409333	3263.73	1052	2.473
857059269	609027788	-1361409725	3266.02	1052	2.473
857059270	609027785	-1361410123	3268.34	1052	2.473
857059271	609027718	-1361410505	3270.67	1052	2.473
857059272	609027652	-1361410881	3272.96	1052	2.463
857059273	609027552	-1361411231	3275.22	1051.8	2.463
857059274	609027450	-1361411564	3277.4	1051.8	2.463
857059275	609027323	-1361411895	3279.67	1051.8	2.454
857059276	609027210	-1361412239	3281.95	1051.8	2.454
857059277	609027085	-1361412596	3284.34	1051.8	2.445
857059278	609026967	-1361412949	3286.68	1051.8	2.445
857059279	609026867	-1361413313	3289.01	1052	2.445
857059280	609026788	-1361413650	3291.12	1052	2.445
857059281	609026707	-1361413970	3293.15	1052	2.435
857059282	609026611	-1361414300	3295.28	1052	2.426
857059283	609026498	-1361414645	3297.56	1052	2.426
857059284	609026386	-1361414970	3299.74	1051.8	2.417
857059285	609026296	-1361415307	3301.89	1051.8	2.417
857059286	609026188	-1361415636	3304.07	1051.8	2.407
857059287	609026049	-1361415979	3306.47	1051.8	2.407
857059288	609025900	-1361416313	3308.87	1051.8	2.398
857059289	609025752	-1361416635	3311.21	1051.8	2.398
857059290	609025618	-1361416959	3313.48	1051.8	2.398
857059291	609025501	-1361417282	3315.67	1052	2.398
857059292	609025358	-1361417635	3318.12	1052	2.389
857059293	609025230	-1361417978	3320.47	1052	2.389
857059294	609025118	-1361418338	3322.83	1052.2	2.389
857059295	609025024	-1361418682	3325.03	1052.2	2.389
857059296	609024920	-1361419022	3327.24	1052.2	2.389
857059297	609024819	-1361419342	3329.34	1052.2	2.379
857059298	609024742	-1361419702	3331.57	1052.2	2.379
857059299	609024663	-1361420054	3333.77	1052.4	2.37
857059300	609024570	-1361420422	3336.1	1052.4	2.37
857059301	609024500	-1361420797	3338.39	1052.4	2.37
857059302	609024436	-1361421181	3340.72	1052.6	2.37
857059303	609024398	-1361421605	3343.23	1052.6	2.37
857059304	609024368	-1361422018	3345.66	1052.6	2.361
857059305	609024339	-1361422494	3348.43	1052.8	2.37
857059306	609024303	-1361422956	3351.16	1052.8	2.379
857059307	609024268	-1361423401	3353.79	1052.8	2.389
857059308	609024232	-1361423820	3356.28	1053	2.389
857059309	609024192	-1361424244	3358.8	1053	2.389
857059310	609024126	-1361424662	3361.33	1053	2.398
857059311	609024071	-1361425055	3363.69	1053	2.398
857059312	609024011	-1361425459	3366.13	1053	2.398
857059313	609023971	-1361425844	3368.42	1053.2	2.398
857059314	609023977	-1361426251	3370.78	1053.2	2.398
857059315	609023926	-1361426625	3373.03	1053.2	2.398
857059316	609023888	-1361427045	3375.51	1053.2	2.398
857059317	609023817	-1361427443	3377.94	1053.2	2.398
857059318	609023792	-1361427849	3380.31	1053.2	2.398
857059319	609023725	-1361428246	3382.72	1053.2	2.398
857059320	609023652	-1361428616	3385.01	1053.2	2.398
857059321	609023598	-1361428963	3387.11	1053.2	2.398
857059322	609023531	-1361429328	3389.34	1053.4	2.389
857059323	609023459	-1361429693	3391.59	1053.4	2.389
857059324	609023393	-1361430056	3393.8	1053.4	2.389
857059325	609023361	-1361430394	3395.81	1053.4	2.389
857059326	609023326	-1361430800	3398.2	1053.4	2.379
857059327	609023290	-1361431209	3400.61	1053.4	2.379
857059328	609023267	-1361431619	3403.02	1053.4	2.379
857059329	609023248	-1361432047	3405.53	1053.4	2.379
857059330	609023246	-1361432493	3408.15	1053.4	2.379
857059331	609023244	-1361432922	3410.67	1053.2	2.379
857059332	609023235	-1361433344	3413.15	1053	2.379
857059333	609023219	-1361433780	3415.72	1053.2	2.379
857059334	609023194	-1361434216	3418.28	1053.2	2.389
857059335	609023180	-1361434633	3420.74	1053.4	2.389
857059336	609023150	-1361435039	3423.14	1053.4	2.389
857059337	609023157	-1361435452	3425.57	1053.2	2.389
857059338	609023157	-1361435856	3427.94	1053	2.389
857059339	609023184	-1361436258	3430.3	1053	2.389
857059340	609023135	-1361436665	3432.73	1053	2.389
857059341	609023127	-1361437072	3435.13	1052.8	2.389
857059342	609023133	-1361437487	3437.56	1052.8	2.389
857059343	609023125	-1361437896	3439.96	1052.8	2.389
857059344	609023169	-1361438311	3442.36	1052.8	2.398
857059345	609023164	-1361438741	3444.89	1052.8	2.398
857059346	609023192	-1361439156	3447.32	1052.8	2.398
857059347	609023134	-1361439573	3449.82	1052.8	2.398
857059348	609023100	-1361439991	3452.3	1052.8	2.398
857059349	609023044	-1361440395	3454.73	1052.6	2.398
857059350	609022995	-1361440794	3457.1	1052.6	2.407
857059351	609022923	-1361441195	3459.55	1052.6	2.407
857059352	609022844	-1361441597	3462.02	1052.6	2.407
857059353	609022751	-1361441999	3464.52	1052.6	2.407
857059354	609022640	-1361442411	3467.14	1052.6	2.407
857059355	609022574	-1361442837	3469.72	1052.6	2.407
857059356	609022541	-1361443284	3472.36	1052.8	2.407
857059357	609022453	-1361443697	3474.92	1052.8	2.417
857059358	609022342	-1361444108	3477.53	1052.8	2.417
857059359	609022270	-1361444541	3480.17	1052.8	2.417
857059360	609022178	-1361444937	3482.64	1052.8	2.426
857059361	609022113	-1361445372	3485.27	1052.6	2.426
857059362	609022056	-1361445814	3487.91	1052.6	2.426
857059363	609022019	-1361446255	3490.52	1052.4	2.435
857059364	609022060	-1361446668	3492.98	1052.4	2.435
857059365	609022213	-1361447082	3495.78	1052.4	2.435
857059366	609022215	-1361447475	3498	1052.4	2.435
857059367	609022263	-1361447819	3500.06	1052.4	2.435
857059368	609022311	-1361448153	3502.07	1052.2	2.435
857059369	609022355	-1361448300	3503.02	1052	2.426
857059370	609022400	-1361448582	3504.73	1052	2.426
857059371	609022441	-1361448877	3506.5	1051.8	2.417
857059372	609022422	-1361449240	3508.58	1051.8	2.417
857059373	609022371	-1361449610	3510.67	1051.8	2.417
857059374	609022255	-1361449956	3512.66	1051.8	2.417
857059375	609022158	-1361450348	3514.99	1051.8	2.407
857059376	609022076	-1361450755	3517.46	1051.8	2.407
857059377	609022016	-1361451150	3519.82	1051.8	2.398
857059378	609021929	-1361451529	3522.11	1051.8	2.389
857059379	609021943	-1361451873	3524.13	1051.8	2.379
857059380	609021908	-1361452233	3526.26	1051.8	2.379
857059381	609021944	-1361452536	3528	1051.8	2.37
857059382	609021930	-1361453051	3531.03	1051.8	2.361
857059383	609021996	-1361453477	3533.54	1051.8	2.361
857059384	609022105	-1361453943	3536.46	1051.8	2.37
857059385	609022224	-1361454452	3539.64	1051.6	2.389
857059386	609022309	-1361455010	3543.01	1051.4	2.398
857059387	609022402	-1361455523	3546.15	1051.4	2.426
857059388	609022529	-1361455977	3549.07	1051.4	2.435
857059389	609022682	-1361456389	3551.88	1051.4	2.454
857059390	609022852	-1361456840	3554.97	1051.6	2.463
857059391	609023040	-1361457263	3558.01	1051.8	2.473
857059392	609023159	-1361457685	3560.71	1051.6	2.491
857059393	609023305	-1361458103	3563.52	1051.6	2.501
857059394	609023397	-1361458545	3566.2	1051.4	2.51
857059395	609023509	-1361458960	3568.84	1051.4	2.519
857059396	609023615	-1361459363	3571.37	1051.4	2.529
857059397	609023717	-1361459758	3573.85	1051.2	2.529
857059398	609023845	-1361460148	3576.43	1051.4	2.529
857059399	609023953	-1361460574	3579.11	1051.4	2.519
857059400	609024078	-1361460968	3581.7	1051.4	2.519
857059401	609024181	-1361461361	3584.2	1051.4	2.51
857059402	609024292	-1361461744	3586.68	1051.4	2.51
857059403	609024402	-1361462118	3589.1	1051.4	2.501
857059404	609024523	-1361462481	3591.52	1051.4	2.501
857059405	609024646	-1361462826	3593.84	1051.4	2.491
857059406	609024746	-1361463177	3596.11	1051.4	2.482
857059407	609024854	-1361463529	3598.41	1051.4	2.473
857059408	609024982	-1361463881	3600.8	1051.4	2.463
857059409	609025102	-1361464244	3603.2	1051.4	2.463
857059410	609025233	-1361464587	3605.56	1051.4	2.454
857059411	609025386	-1361464931	3608.03	1051.4	2.454
857059412	609025558	-1361465271	3610.6	1051.4	2.454
857059413	609025731	-1361465591	3613.05	1051.4	2.454
857059414	609025891	-1361465940	3615.59	1051.4	2.454
857059415	609026046	-1361466295	3618.12	1051.4	2.454
857059416	609026187	-1361466651	3620.59	1051.6	2.454
857059417	609026332	-1361467018	3623.14	1051.8	2.454
857059418	609026475	-1361467368	3625.59	1051.8	2.454
857059419	609026625	-1361467715	3628.06	1051.8	2.454
857059420	609026784	-1361468056	3630.55	1051.8	2.454
857059421	609026955	-1361468375	3633.01	1052	2.454
857059422	609027134	-1361468664	3635.4	1052	2.454
857059423	609027315	-1361468947	3637.77	1052	2.454
857059424	609027502	-1361469235	3640.19	1052	2.454
857059425	609027666	-1361469509	3642.41	1052	2.435
857059426	609027847	-1361469800	3644.81	1052.2	2.417
857059427	609028020	-1361470075	3647.09	1052.2	2.417
857059428	609028205	-1361470352	3649.45	1052.4	2.407
857059429	609028396	-1361470618	3651.83	1052.4	2.398
857059430	609028584	-1361470877	3654.15	1052.4	2.398
857059431	609028774	-1361471143	3656.51	1052.6	2.389
857059432	609028956	-1361471406	3658.8	1052.6	2.37
857059433	609029135	-1361471678	3661.11	1052.6	2.361
857059434	609029307	-1361471944	3663.35	1052.8	2.361
857059435	609029480	-1361472224	3665.66	1052.8	2.361
857059436	609029655	-1361472493	3667.92	1053	2.351
857059437	609029849	-1361472767	3670.34	1053	2.351
857059438	609030037	-1361473038	3672.7	1053	2.351
857059439	609030217	-1361473307	3675.01	1053	2.351
857059440	609030391	-1361473533	3677.09	1053	2.351
857059441	609030555	-1361473732	3679.02	1053	2.351
857059442	609030728	-1361473980	3681.19	1053.2	2.342
857059443	609030910	-1361474223	3683.41	1053.4	2.342
857059444	609031091	-1361474492	3685.72	1053.4	2.333
857059445	609031279	-1361474749	3688.02	1053.6	2.333
857059446	609031478	-1361474997	3690.38	1053.6	2.333
857059447	609031663	-1361475266	3692.72	1053.6	2.333
857059448	609031834	-1361475560	3695.06	1053.8	2.333
857059449	609032022	-1361475861	3697.55	1054	2.351
857059450	609032189	-1361476142	3699.8	1054	2.361
857059451	609032370	-1361476419	3702.14	1054	2.37
857059452	609032531	-1361476677	3704.27	1054	2.361
857059453	609032708	-1361476944	3706.55	1054.2	2.361
857059454	609032889	-1361477201	3708.81	1054.2	2.361
857059455	609033091	-1361477445	3711.17	1054.2	2.361
857059456	609033298	-1361477692	3713.6	1054.2	2.361
857059457	609033483	-1361477957	3715.92	1054.2	2.361
857059458	609033664	-1361478248	3718.32	1054.2	2.361
857059459	609033818	-1361478528	3720.49	1054.2	2.361
857059460	609033995	-1361478805	3722.81	1054.2	2.351
857059461	609034190	-1361479071	3725.21	1054.4	2.351
857059462	609034389	-1361479349	3727.68	1054.4	2.351
857059463	609034586	-1361479626	3730.12	1054.6	2.361
857059464	609034795	-1361479869	3732.54	1054.6	2.361
857059465	609035005	-1361480100	3734.92	1054.6	2.361
857059466	609035205	-1361480338	3737.25	1054.6	2.361
857059467	609035417	-1361480587	3739.7	1054.6	2.37
857059468	609035616	-1361480815	3741.98	1054.6	2.37
857059469	609035836	-1361481016	3744.34	1054.6	2.37
857059470	609036042	-1361481249	3746.7	1054.6	2.37
857059471	609036259	-1361481469	3749.1	1054.6	2.379
857059472	609036489	-1361481694	3751.61	1054.6	2.379
857059473	609036703	-1361481933	3754.05	1054.6	2.389
857059474	609036904	-1361482192	3756.46	1054.6	2.389
857059475	609037118	-1361482435	3758.91	1054.6	2.389
857059476	609037347	-1361482678	3761.48	1054.6	2.398
857059477	609037588	-1361482904	3764.09	1054.6	2.398
857059478	609037835	-1361483094	3766.64	1054.8	2.407
857059479	609038076	-1361483278	3769.13	1054.8	2.417
857059480	609038308	-1361483483	3771.6	1054.6	2.417
857059481	609038518	-1361483689	3773.9	1054.6	2.417
857059482	609038751	-1361483875	3776.33	1054.6	2.417
857059483	609039002	-1361484010	3778.78	1054.6	2.417
857059484	609039260	-1361484105	3781.25	1054.4	2.417
857059485	609039508	-1361484221	3783.66	1054.6	2.426
857059486	609039763	-1361484361	3786.17	1054.6	2.426
857059487	609040001	-1361484523	3788.59	1054.6	2.426
857059488	609040243	-1361484699	3791.07	1054.4	2.426
857059489	609040474	-1361484884	3793.48	1054.4	2.435
857059490	609040716	-1361485043	3795.91	1054.4	2.435
857059491	609040963	-1361485168	3798.33	1054.6	2.435
857059492	609041206	-1361485276	3800.68	1054.6	2.435
857059493	609041459	-1361485356	3803.08	1054.6	2.435
857059494	609041712	-1361485456	3805.51	1054.6	2.435
857059495	609041957	-1361485570	3807.9	1054.6	2.426
857059496	609042198	-1361485699	3810.26	1054.6	2.426
857059497	609042467	-1361485793	3812.82	1054.6	2.426
857059498	609042704	-1361485927	3815.14	1054.4	2.426
857059499	609042951	-1361486025	3817.52	1054.4	2.426
857059500	609043188	-1361486145	3819.82	1054.4	2.426
857059501	609043436	-1361486262	3822.24	1054.4	2.417
857059502	609043666	-1361486433	3824.57	1054.6	2.417
857059503	609043909	-1361486564	3826.96	1054.6	2.407
857059504	609044150	-1361486665	3829.26	1054.6	2.407
857059505	609044398	-1361486729	3831.61	1054.6	2.398
857059506	609044653	-1361486811	3834.03	1054.6	2.389
857059507	609044901	-1361486912	3836.42	1054.6	2.389
857059508	609045151	-1361487029	3838.84	1054.8	2.389
857059509	609045398	-1361487151	3841.25	1054.8	2.389
857059510	609045646	-1361487250	3843.63	1054.8	2.389
857059511	609045884	-1361487360	3845.93	1054.8	2.389
857059512	609046137	-1361487435	3848.3	1054.6	2.389
857059513	609046373	-1361487579	3850.62	1054.6	2.379
857059514	609046622	-1361487667	3852.99	1054.6	2.389
857059515	609046864	-1361487798	3855.37	1054.6	2.379
857059516	609047114	-1361487901	3857.76	1054.6	2.379
857059517	609047356	-1361488018	3860.09	1054.6	2.379
857059518	609047606	-1361488096	3862.46	1054.6	2.379
857059519	609047842	-1361488191	3864.73	1054.6	2.379
857059520	609048085	-1361488283	3867.05	1054.8	2.379
857059521	609048295	-1361488409	3869.12	1054.8	2.379
857059522	609048535	-1361488487	3871.4	1054.8	2.37
857059523	609048779	-1361488567	3873.72	1054.8	2.37
857059524	609049015	-1361488656	3875.99	1055	2.37
857059525	609049268	-1361488753	3878.41	1055.2	2.37
857059526	609049503	-1361488879	3880.7	1055	2.361
857059527	609049758	-1361488967	3883.11	1055	2.361
857059528	609049991	-1361489103	3885.39	1054.8	2.361
857059529	609050234	-1361489201	3887.72	1054.8	2.361
857059530	609050460	-1361489322	3889.94	1054.8	2.351
857059531	609050693	-1361489430	3892.2	1055	2.342
857059532	609050924	-1361489562	3894.46	1055	2.342
857059533	609051165	-1361489668	3896.79	1055.2	2.342
857059534	609051409	-1361489765	3899.13	1055.2	2.333
857059535	609051652	-1361489866	3901.47	1055.2	2.342
857059536	609051904	-1361489965	3903.88	1055.4	2.333
857059537	609052137	-1361490095	3906.17	1055.4	2.333
857059538	609052384	-1361490201	3908.55	1055.4	2.333
857059539	609052618	-1361490330	3910.86	1055.4	2.333
857059540	609052852	-1361490531	3913.23	1055.4	2.333
857059541	609053095	-1361490639	3915.58	1055.4	2.342
857059542	609053332	-1361490785	3917.95	1055.2	2.342
857059543	609053565	-1361490949	3920.33	1055.2	2.342
857059544	609053793	-1361491110	3922.64	1055.2	2.342
857059545	609054027	-1361491258	3924.99	1055.2	2.342
857059546	609054253	-1361491426	3927.32	1055.2	2.342
857059547	609054500	-1361491571	3929.77	1055.4	2.342
857059548	609054741	-1361491689	3932.12	1055.4	2.342
857059549	609054974	-1361491814	3934.42	1055.4	2.342
857059550	609055213	-1361491934	3936.76	1055.4	2.333
857059551	609055453	-1361492073	3939.13	1055.4	2.333
857059552	609055704	-1361492205	3941.6	1055.6	2.333
857059553	609055942	-1361492334	3943.94	1055.4	2.333
857059554	609056188	-1361492454	3946.34	1055.6	2.333
857059555	609056423	-1361492564	3948.62	1055.6	2.333
857059556	609056646	-1361492693	3950.84	1055.6	2.333
857059557	609056887	-1361492854	3953.28	1055.6	2.333
857059558	609057131	-1361493016	3955.75	1055.6	2.333
857059559	609057387	-1361493159	3958.28	1055.6	2.333
857059560	609057633	-1361493299	3960.71	1055.6	2.342
857059561	609057880	-1361493438	3963.16	1055.6	2.342
857059562	609058126	-1361493586	3965.61	1055.6	2.342
857059563	609058379	-1361493740	3968.13	1055.6	2.342
857059564	609058613	-1361493932	3970.59	1055.6	2.342
857059565	609058848	-1361494131	3973.08	1055.6	2.351
857059566	609059066	-1361494349	3975.47	1055.4	2.351
857059567	609059304	-1361494528	3977.92	1055.2	2.351
857059568	609059516	-1361494723	3980.2	1055.2	2.351
857059569	609059745	-1361494901	3982.59	1055.2	2.351
857059570	609059959	-1361495095	3984.87	1055	2.351
857059571	609060183	-1361495295	3987.27	1055	2.351
857059572	609060417	-1361495490	3989.74	1055.2	2.361
857059573	609060633	-1361495713	3992.14	1055.2	2.361
857059574	609060843	-1361495912	3994.41	1055.2	2.361
857059575	609061058	-1361496117	3996.75	1055.2	2.361
857059576	609061275	-1361496337	3999.15	1055.2	2.361
857059577	609061501	-1361496536	4001.56	1055.2	2.361
857059578	609061722	-1361496751	4003.97	1055.2	2.361
857059579	609061935	-1361496973	4006.35	1055.2	2.361
857059580	609062155	-1361497192	4008.77	1055.2	2.37
857059581	609062361	-1361497409	4011.05	1055.2	2.37
857059582	609062584	-1361497629	4013.49	1055.2	2.37
857059583	609062787	-1361497883	4015.89	1055.2	2.37
857059584	609062997	-1361498124	4018.3	1055.2	2.37
857059585	609063189	-1361498423	4020.77	1055.2	2.379
857059586	609063405	-1361498638	4023.13	1055.2	2.379
857059587	609063585	-1361498962	4025.65	1055.2	2.379
857059588	609063784	-1361499211	4028.02	1055.2	2.379
857059589	609063971	-1361499472	4030.33	1055.2	2.379
857059590	609064165	-1361499710	4032.62	1055.4	2.37
857059591	609064355	-1361499965	4034.93	1055.4	2.37
857059592	609064547	-1361500202	4037.2	1055.4	2.361
857059593	609064749	-1361500446	4039.56	1055.4	2.351
857059594	609064944	-1361500715	4041.95	1055.4	2.351
857059595	609065151	-1361500979	4044.43	1055.4	2.351
857059596	609065354	-1361501230	4046.83	1055.4	2.351
857059597	609065556	-1361501482	4049.22	1055.4	2.351
857059598	609065729	-1361501751	4051.46	1055.4	2.351
857059599	609065925	-1361502006	4053.82	1055.4	2.351
857059600	609066090	-1361502320	4056.2	1055.4	2.342
857059601	609066286	-1361502564	4058.51	1055.4	2.342
857059602	609066458	-1361502883	4060.95	1055.4	2.342
857059603	609066642	-1361503175	4063.37	1055.4	2.342
857059604	609066821	-1361503490	4065.86	1055.4	2.351
857059605	609066999	-1361503796	4068.31	1055.4	2.361
857059606	609067179	-1361504113	4070.81	1055.4	2.361
857059607	609067360	-1361504430	4073.33	1055.4	2.37
857059608	609067533	-1361504762	4075.86	1055.4	2.37
857059609	609067712	-1361505085	4078.38	1055.4	2.37
857059610	609067896	-1361505404	4080.92	1055.4	2.379
857059611	609068065	-1361505713	4083.32	1055.4	2.389
857059612	609068239	-1361506014	4085.72	1055.4	2.389
857059613	609068404	-1361506315	4088.06	1055.4	2.389
857059614	609068587	-1361506603	4090.46	1055.4	2.389
857059615	609068750	-1361506922	4092.86	1055.4	2.379
857059616	609068924	-1361507221	4095.25	1055.4	2.379
857059617	609069100	-1361507516	4097.63	1055.4	2.379
857059618	609069285	-1361507806	4100.05	1055.4	2.379
857059619	609069461	-1361508110	4102.47	1055.4	2.379
857059620	609069634	-1361508423	4104.92	1055.4	2.379
857059621	609069788	-1361508750	4107.31	1055.4	2.379
857059622	609069946	-1361509054	4109.63	1055.4	2.379
857059623	609070110	-1361509349	4111.94	1055.2	2.379
857059624	609070271	-1361509671	4114.35	1055.2	2.379
857059625	609070441	-1361509987	4116.79	1055	2.37
857059626	609070615	-1361510291	4119.21	1055	2.379
857059627	609070779	-1361510605	4121.6	1055	2.379
857059628	609070928	-1361510914	4123.89	1054.8	2.379
857059629	609071084	-1361511189	4126.06	1054.8	2.37
857059630	609071220	-1361511432	4127.96	1054.8	2.37
857059631	609071256	-1361511669	4129.38	1054.8	2.37
857059632	609071205	-1361511782	4130.11	1054.8	2.361
857059633	609071101	-1361511744	4131.1	1054.8	2.323
857059634	609071016	-1361511630	4132.13	1054.8	1.484
857059635	609070918	-1361511475	4133.42	1054.8	1.213
857059636	609070811	-1361511292	4134.89	1054.8	1.213
857059637	609070695	-1361511133	4136.3	1054.8	1.316
857059638	609070570	-1361510966	4137.8	1054.8	1.325
857059639	609070452	-1361510776	4139.36	1055	1.372
857059640	609070340	-1361510610	4140.79	1055	1.372
857059641	609070234	-1361510418	4142.28	1055	1.39
857059642	609070140	-1361510233	4143.68	1055	1.372
857059643	609070043	-1361510043	4145.11	1055	1.372
857059644	609069946	-1361509876	4146.45	1055	1.372
857059645	609069857	-1361509675	4147.89	1055	1.362
857059646	609069746	-1361509508	4149.31	1055	1.362
857059647	609069627	-1361509346	4150.77	1054.8	1.362
857059648	609069509	-1361509149	4152.37	1054.8	1.372
857059649	609069390	-1361508977	4153.87	1054.8	1.4
857059650	609069277	-1361508792	4155.37	1054.8	1.409
857059651	609069176	-1361508626	4156.73	1054.8	1.409
857059652	609069064	-1361508464	4158.14	1054.8	1.4
857059653	609068951	-1361508289	4159.61	1054.8	1.4
857059654	609068853	-1361508105	4161.02	1054.8	1.418
857059655	609068778	-1361507958	4162.13	1054.8	1.418
857059656	609068702	-1361507822	4163.2	1054.8	1.372
857059657	609068626	-1361507680	4164.29	1054.8	1.288
857059658	609068538	-1361507520	4165.54	1054.8	1.278
857059659	609068454	-1361507346	4166.83	1054.8	1.278
857059660	609068348	-1361507168	4168.26	1054.8	1.278
857059661	609068253	-1361506978	4169.68	1054.6	1.278
857059662	609068158	-1361506781	4171.13	1054.6	1.288
857059663	609068077	-1361506560	4172.63	1054.8	1.297
857059664	609067983	-1361506352	4174.14	1054.8	1.306
857059665	609067855	-1361506153	4175.8	1054.8	1.306
857059666	609067734	-1361505979	4177.32	1054.8	1.325
857059667	609067620	-1361505796	4178.83	1054.8	1.334
857059668	609067512	-1361505613	4180.3	1054.8	1.344
857059669	609067406	-1361505432	4181.75	1055	1.344
857059670	609067300	-1361505254	4183.18	1055	1.353
857059671	609067216	-1361505077	4184.48	1055	1.353
857059672	609067146	-1361504901	4185.7	1055	1.353
857059673	609067068	-1361504737	4186.92	1055	1.344
857059674	609066958	-1361504573	4188.32	1055	1.344
857059675	609066852	-1361504436	4189.59	1055	1.344
857059676	609066751	-1361504270	4190.95	1055	1.344
857059677	609066651	-1361504101	4192.3	1055	1.344
857059678	609066540	-1361503960	4193.63	1055	1.344
857059679	609066435	-1361503802	4194.96	1055	1.344
857059680	609066312	-1361503630	4196.47	1055	1.344
857059681	609066191	-1361503473	4197.93	1055	1.344
857059682	609066059	-1361503332	4199.38	1055	1.344
857059683	609065950	-1361503177	4200.74	1055	1.353
857059684	609065858	-1361503032	4201.94	1055	1.353
857059685	609065770	-1361502900	4203.07	1055	1.344
857059686	609065662	-1361502774	4204.3	1055	1.344
857059687	609065571	-1361502634	4205.48	1055	1.344
857059688	609065474	-1361502512	4206.63	1055	1.334
857059689	609065370	-1361502392	4207.83	1055	1.334
857059690	609065284	-1361502268	4208.91	1055	1.325
857059691	609065177	-1361502172	4210.05	1055.2	1.316
857059692	609065051	-1361502113	4211.27	1055.4	1.316
857059693	609064998	-1361502024	4211.99	1055.4	1.306
857059694	609065029	-1361501976	4212.23	1055.4	1.297
857059695	609065131	-1361501996	4213.15	1055.4	1.278
857059696	609065264	-1361502069	4214.44	1055.4	1.204
857059697	609065419	-1361502205	4216.08	1055.4	1.204
857059698	609065579	-1361502382	4217.89	1055.4	1.344
857059699	609065729	-1361502624	4219.88	1055.4	1.577
857059700	609065911	-1361502885	4222.16	1055.4	1.689
857059701	609066103	-1361503144	4224.49	1055.4	2.071
857059702	609066315	-1361503437	4227.09	1055.4	2.146
857059703	609066509	-1361503737	4229.61	1055.4	2.361
857059704	609066725	-1361504005	4232.16	1055.2	2.37
857059705	609066917	-1361504250	4234.45	1055	2.379
857059706	609067135	-1361504515	4237	1055	2.398
857059707	609067348	-1361504808	4239.63	1054.8	2.426
857059708	609067563	-1361505114	4242.32	1054.8	2.482
857059709	609067783	-1361505419	4245.02	1054.6	2.547
857059710	609067977	-1361505740	4247.63	1054.6	2.585
857059711	609068174	-1361506053	4250.23	1055.4	2.585
857059712	609068365	-1361506354	4252.74	1055.6	2.585
857059713	609068546	-1361506675	4255.26	1055.6	2.575
857059714	609068718	-1361506994	4257.73	1055.8	2.575
857059715	609068909	-1361507318	4260.33	1055.2	2.566
857059716	609069088	-1361507675	4263.01	1055.4	2.566
857059717	609069268	-1361508026	4265.67	1055.4	2.566
857059718	609069446	-1361508345	4268.17	1055.6	2.557
857059719	609069609	-1361508679	4270.65	1055.8	2.557
857059720	609069773	-1361509011	4273.13	1055.8	2.557
857059721	609069947	-1361509350	4275.7	1055.6	2.557
857059722	609070113	-1361509679	4278.18	1055	2.538
857059723	609070276	-1361510003	4280.61	1055.2	2.538
857059724	609070444	-1361510320	4283.04	1055.2	2.529
857059725	609070620	-1361510637	4285.52	1055.4	2.519
857059726	609070790	-1361510969	4288.04	1055.6	2.501
857059727	609070958	-1361511303	4290.55	1055.4	2.501
857059728	609071142	-1361511621	4293.08	1055.6	2.501
857059729	609071335	-1361511929	4295.63	1055.6	2.501
857059730	609071521	-1361512232	4298.12	1055.6	2.501
857059731	609071698	-1361512530	4300.52	1055.6	2.501
857059732	609071870	-1361512811	4302.83	1055.6	2.501
857059733	609072029	-1361513085	4305.01	1055.4	2.501
857059734	609072164	-1361513382	4307.17	1055.4	2.491
857059735	609072318	-1361513698	4309.51	1055.6	2.491
857059736	609072468	-1361514019	4311.85	1055	2.482
857059737	609072620	-1361514330	4314.17	1055.2	2.482
857059738	609072763	-1361514642	4316.43	1055.4	2.473
857059739	609072925	-1361514933	4318.7	1055.4	2.473
857059740	609073086	-1361515231	4321.01	1055.4	2.473
857059741	609073251	-1361515552	4323.44	1055.4	2.463
857059742	609073426	-1361515865	4325.91	1055.4	2.463
857059743	609073608	-1361516179	4328.41	1055.4	2.463
857059744	609073783	-1361516479	4330.81	1055.4	2.463
857059745	609073962	-1361516784	4333.26	1055.4	2.463
857059746	609074160	-1361517059	4335.72	1055.4	2.463
857059747	609074352	-1361517339	4338.14	1055.4	2.454
857059748	609074509	-1361517627	4340.37	1055.4	2.454
857059749	609074680	-1361517919	4342.71	1055.4	2.454
857059750	609074846	-1361518201	4344.98	1055.4	2.454
857059751	609075047	-1361518482	4347.48	1055.4	2.454
857059752	609075233	-1361518797	4350	1055.4	2.454
857059753	609075427	-1361519114	4352.59	1055.4	2.454
857059754	609075602	-1361519454	4355.16	1055.4	2.454
857059755	609075784	-1361519776	4357.7	1055.4	2.463
857059756	609075952	-1361520092	4360.13	1055.4	2.463
857059757	609076084	-1361520426	4362.43	1055.4	2.463
857059758	609076248	-1361520758	4364.91	1055.4	2.463
857059759	609076402	-1361521096	4367.35	1055.4	2.463
857059760	609076577	-1361521430	4369.9	1055.4	2.463
857059761	609076720	-1361521758	4372.24	1055.2	2.463
857059762	609076877	-1361522072	4374.59	1055.2	2.454
857059763	609077062	-1361522377	4377.08	1055.2	2.454
857059764	609077257	-1361522667	4379.57	1055.2	2.454
857059765	609077439	-1361522955	4381.96	1055.4	2.454
857059766	609077634	-1361523237	4384.43	1055.4	2.454
857059767	609077810	-1361523539	4386.82	1055.4	2.454
857059768	609077995	-1361523841	4389.29	1055.2	2.454
857059769	609078140	-1361524170	4391.64	1055.2	2.454
857059770	609078306	-1361524515	4394.18	1055	2.454
857059771	609078460	-1361524860	4396.64	1055	2.463
857059772	609078624	-1361525199	4399.15	1055	2.463
857059773	609078774	-1361525542	4401.59	1055	2.463
857059774	609078926	-1361525883	4404.04	1055	2.463
857059775	609079084	-1361526222	4406.51	1055	2.463
857059776	609079222	-1361526561	4408.88	1055	2.463
857059777	609079362	-1361526904	4411.27	1055	2.454
857059778	609079508	-1361527236	4413.64	1055	2.454
857059779	609079656	-1361527574	4416.05	1055	2.454
857059780	609079807	-1361527908	4418.45	1055	2.454
857059781	609079981	-1361528222	4420.9	1055	2.454
857059782	609080121	-1361528527	4423.1	1055	2.454
857059783	609080285	-1361528822	4425.41	1055	2.454
857059784	609080449	-1361529129	4427.78	1055	2.445
857059785	609080588	-1361529451	4430.07	1055	2.445
857059786	609080725	-1361529774	4432.34	1055	2.435
857059787	609080877	-1361530099	4434.72	1055	2.426
857059788	609081020	-1361530446	4437.14	1055	2.426
857059789	609081179	-1361530771	4439.55	1055	2.426
857059790	609081336	-1361531104	4442	1055.2	2.426
857059791	609081494	-1361531415	4444.34	1055.2	2.426
857059792	609081653	-1361531700	4446.58	1055.2	2.426
857059793	609081835	-1361531976	4448.92	1055.2	2.417
857059794	609082004	-1361532272	4451.27	1055.2	2.417
857059795	609082164	-1361532591	4453.66	1055.2	2.417
857059796	609082339	-1361532914	4456.17	1055.2	2.417
857059797	609082507	-1361533237	4458.63	1055.2	2.417
857059798	609082668	-1361533565	4461.07	1055.4	2.417
857059799	609082829	-1361533890	4463.49	1055.4	2.417
857059800	609082987	-1361534216	4465.91	1055.4	2.417
857059801	609083147	-1361534519	4468.24	1055.4	2.417
857059802	609083309	-1361534824	4470.58	1055.6	2.417
857059803	609083468	-1361535126	4472.89	1055.6	2.417
857059804	609083640	-1361535433	4475.31	1055.6	2.417
857059805	609083807	-1361535733	4477.66	1055.6	2.417
857059806	609083972	-1361536027	4479.97	1055.6	2.417
857059807	609084144	-1361536320	4482.32	1055.6	2.417
857059808	609084305	-1361536626	4484.66	1055.4	2.407
857059809	609084453	-1361536945	4486.99	1055.4	2.407
857059810	609084578	-1361537273	4489.23	1055.4	2.407
857059811	609084702	-1361537593	4491.43	1055.4	2.407
857059812	609084808	-1361537918	4493.55	1055.4	2.398
857059813	609084945	-1361538229	4495.78	1055.2	2.398
857059814	609085079	-1361538555	4498.04	1055.4	2.398
857059815	609085235	-1361538865	4500.37	1055.4	2.398
857059816	609085377	-1361539179	4502.63	1055.4	2.389
857059817	609085525	-1361539475	4504.85	1055.2	2.389
857059818	609085653	-1361539785	4507.02	1055.2	2.389
857059819	609085792	-1361540108	4509.31	1055.2	2.379
857059820	609085909	-1361540434	4511.51	1055.2	2.379
857059821	609086043	-1361540773	4513.86	1055.2	2.37
857059822	609086133	-1361541129	4516.05	1055.2	2.37
857059823	609086279	-1361541461	4518.42	1055.2	2.37
857059824	609086396	-1361541816	4520.74	1055.4	2.37
857059825	609086548	-1361542174	4523.26	1055.4	2.37
857059826	609086670	-1361542498	4525.45	1055.4	2.37
857059827	609086815	-1361542821	4527.78	1055.4	2.37
857059828	609086931	-1361543154	4530	1055.4	2.37
857059829	609087071	-1361543478	4532.28	1055.4	2.37
857059830	609087218	-1361543778	4534.51	1055.4	2.37
857059831	609087383	-1361544084	4536.87	1055.4	2.37
857059832	609087549	-1361544393	4539.26	1055.6	2.361
857059833	609087710	-1361544695	4541.58	1055.6	2.361
857059834	609087868	-1361544985	4543.83	1055.6	2.361
857059835	609088012	-1361545278	4546.01	1055.6	2.361
857059836	609088157	-1361545597	4548.32	1055.6	2.351
857059837	609088297	-1361545909	4550.57	1055.6	2.351
857059838	609088445	-1361546237	4552.93	1055.6	2.342
857059839	609088586	-1361546558	4555.22	1055.6	2.342
857059840	609088715	-1361546891	4557.51	1055.6	2.342
857059841	609088846	-1361547224	4559.81	1055.6	2.342
857059842	609088994	-1361547544	4562.14	1055.6	2.333
857059843	609089113	-1361547863	4564.3	1055.8	2.333
857059844	609089221	-1361548216	4566.6	1055.8	2.333
857059845	609089341	-1361548551	4568.86	1055.8	2.333
857059846	609089460	-1361548873	4571.05	1055.8	2.323
857059847	609089590	-1361549199	4573.32	1055.8	2.323
857059848	609089726	-1361549549	4575.73	1055.8	2.323
857059849	609089859	-1361549879	4578.03	1055.8	2.323
857059850	609089978	-1361550196	4580.2	1055.8	2.323
857059851	609090105	-1361550526	4582.47	1055.8	2.314
857059852	609090235	-1361550848	4584.71	1055.8	2.314
857059853	609090383	-1361551159	4587	1055.8	2.314
857059854	609090541	-1361551467	4589.33	1056	2.314
857059855	609090686	-1361551772	4591.58	1056	2.305
857059856	609090837	-1361552093	4593.93	1056	2.305
857059857	609091008	-1361552395	4596.31	1056	2.305
857059858	609091157	-1361552715	4598.65	1056	2.305
857059859	609091328	-1361553015	4601.02	1056	2.305
857059860	609091486	-1361553314	4603.31	1056	2.305
857059861	609091641	-1361553624	4605.64	1056	2.305
857059862	609091794	-1361553956	4608.05	1056	2.305
857059863	609091931	-1361554299	4610.43	1056.2	2.305
857059864	609092072	-1361554636	4612.8	1056.2	2.305
857059865	609092210	-1361554961	4615.07	1056.2	2.305
857059866	609092361	-1361555287	4617.45	1056.2	2.305
857059867	609092489	-1361555622	4619.72	1056.4	2.305
857059868	609092624	-1361555963	4622.07	1056.4	2.305
857059869	609092754	-1361556303	4624.38	1056.6	2.305
857059870	609092895	-1361556620	4626.67	1056.6	2.305
857059871	609093027	-1361556930	4628.86	1056.4	2.305
857059872	609093170	-1361557210	4630.98	1056.4	2.305
857059873	609093313	-1361557502	4633.14	1056.6	2.295
857059874	609093445	-1361557792	4635.24	1056.6	2.295
857059875	609093590	-1361558088	4637.45	1056.6	2.286
857059876	609093727	-1361558402	4639.69	1056.6	2.286
857059877	609093876	-1361558707	4641.96	1056.6	2.286
857059878	609093995	-1361559053	4644.26	1056.6	2.286
857059879	609094125	-1361559407	4646.66	1056.6	2.277
857059880	609094229	-1361559773	4648.99	1056.6	2.286
857059881	609094356	-1361560116	4651.33	1056.6	2.286
857059882	609094492	-1361560455	4653.69	1056.6	2.277
857059883	609094624	-1361560811	4656.11	1056.6	2.277
857059884	609094757	-1361561151	4658.46	1056.6	2.277
857059885	609094898	-1361561473	4660.76	1056.6	2.277
857059886	609095052	-1361561787	4663.1	1056.6	2.277
857059887	609095204	-1361562094	4665.4	1056.4	2.277
857059888	609095341	-1361562423	4667.71	1056.4	2.277
857059889	609095457	-1361562769	4670.01	1056.4	2.277
857059890	609095568	-1361563121	4672.32	1056.6	2.277
857059891	609095691	-1361563476	4674.7	1056.6	2.277
857059892	609095800	-1361563835	4677.04	1056.6	2.277
857059893	609095920	-1361564167	4679.27	1056.8	2.277
857059894	609096045	-1361564493	4681.52	1056.8	2.277
857059895	609096147	-1361564829	4683.7	1056.8	2.277
857059896	609096242	-1361565165	4685.85	1056.6	2.277
857059897	609096329	-1361565526	4688.12	1056.6	2.277
857059898	609096384	-1361565933	4690.57	1056.6	2.277
857059899	609096479	-1361566313	4692.97	1056.6	2.277
857059900	609096583	-1361566678	4695.32	1056.6	2.277
857059901	609096676	-1361567030	4697.54	1056.6	2.277
857059902	609096800	-1361567386	4699.93	1056.6	2.277
857059903	609096913	-1361567750	4702.31	1056.8	2.277
857059904	609097023	-1361568114	4704.69	1056.8	2.277
857059905	609097150	-1361568480	4707.14	1056.8	2.277
857059906	609097279	-1361568839	4709.57	1056.8	2.277
857059907	609097390	-1361569205	4711.96	1056.8	2.286
857059908	609097503	-1361569557	4714.28	1056.8	2.286
857059909	609097627	-1361569907	4716.63	1056.8	2.286
857059910	609097726	-1361570281	4719.01	1057	2.286
857059911	609097811	-1361570653	4721.33	1057	2.286
857059912	609097884	-1361571025	4723.6	1057	2.286
857059913	609097982	-1361571373	4725.84	1057	2.286
857059914	609098074	-1361571731	4728.1	1057	2.286
857059915	609098177	-1361572113	4730.54	1057	2.286
857059916	609098270	-1361572483	4732.87	1057	2.286
857059917	609098380	-1361572826	4735.13	1057	2.286
857059918	609098485	-1361573192	4737.5	1057	2.286
857059919	609098585	-1361573553	4739.81	1057	2.286
857059920	609098691	-1361573915	4742.16	1057	2.286
857059921	609098790	-1361574270	4744.44	1057	2.267
857059922	609098888	-1361574624	4746.71	1057	2.267
857059923	609098992	-1361574967	4748.95	1057	2.267
857059924	609099099	-1361575324	4751.26	1057	2.267
857059925	609099197	-1361575681	4753.55	1057	2.267
857059926	609099307	-1361576038	4755.88	1057	2.267
857059927	609099414	-1361576397	4758.21	1057	2.267
857059928	609099525	-1361576751	4760.53	1057	2.267
857059929	609099637	-1361577114	4762.9	1057	2.267
857059930	609099745	-1361577472	4765.24	1057	2.267
857059931	609099855	-1361577831	4767.58	1057	2.267
857059932	609099974	-1361578179	4769.91	1057	2.267
857059933	609100090	-1361578547	4772.33	1057	2.277
857059934	609100202	-1361578898	4774.64	1057.2	2.277
857059935	609100324	-1361579262	4777.06	1057.2	2.277
857059936	609100434	-1361579624	4779.42	1057.2	2.286
857059937	609100557	-1361579979	4781.8	1057.2	2.286
857059938	609100681	-1361580329	4784.16	1057.2	2.286
857059939	609100799	-1361580715	4786.68	1057.2	2.286
857059940	609100924	-1361581073	4789.08	1057.2	2.286
857059941	609101051	-1361581426	4791.47	1057.4	2.342
857059942	609101188	-1361581785	4793.94	1057.4	2.342
857059943	609101316	-1361582146	4796.38	1057.4	2.342
857059944	609101431	-1361582534	4798.89	1057.4	2.342
857059945	609101548	-1361582892	4801.24	1057.4	2.342
857059946	609101679	-1361583255	4803.7	1057.4	2.342
857059947	609101824	-1361583594	4806.1	1057.6	2.342
857059948	609101974	-1361583923	4808.48	1057.6	2.342
857059949	609102119	-1361584252	4810.85	1057.6	2.342
857059950	609102263	-1361584584	4813.21	1057.6	2.333
857059951	609102422	-1361584928	4815.72	1057.6	2.333
857059952	609102563	-1361585254	4818.03	1057.6	2.333
857059953	609102723	-1361585585	4820.48	1057.6	2.333
857059954	609102890	-1361585912	4822.95	1057.6	2.333
857059955	609103063	-1361586232	4825.42	1057.6	2.333
857059956	609103228	-1361586539	4827.79	1057.6	2.333
857059957	609103399	-1361586845	4830.19	1057.6	2.333
857059958	609103561	-1361587163	4832.59	1057.6	2.333
857059959	609103717	-1361587474	4834.93	1057.6	2.333
857059960	609103886	-1361587779	4837.31	1057.6	2.333
857059961	609104041	-1361588090	4839.62	1057.6	2.333
857059962	609104203	-1361588401	4841.99	1057.6	2.333
857059963	609104355	-1361588723	4844.34	1057.6	2.333
857059964	609104512	-1361589025	4846.64	1057.6	2.333
857059965	609104663	-1361589338	4848.95	1057.6	2.333
857059966	609104805	-1361589656	4851.24	1057.6	2.333
857059967	609104940	-1361589978	4853.51	1057.6	2.333
857059968	609105071	-1361590277	4855.65	1057.6	2.323
857059969	609105204	-1361590606	4857.95	1057.6	2.323
857059970	609105338	-1361590940	4860.27	1057.6	2.323
857059971	609105479	-1361591283	4862.68	1057.6	2.323
857059972	609105625	-1361591615	4865.06	1057.6	2.323
857059973	609105771	-1361591966	4867.53	1057.8	2.323
857059974	609105915	-1361592332	4870.07	1057.8	2.323
857059975	609106041	-1361592697	4872.51	1057.8	2.323
857059976	609106155	-1361593058	4874.88	1057.8	2.323
857059977	609106266	-1361593417	4877.24	1057.8	2.323
857059978	609106384	-1361593771	4879.59	1057.8	2.323
857059979	609106494	-1361594149	4882.03	1057.8	2.323
857059980	609106598	-1361594522	4884.43	1057.8	2.333
857059981	609106708	-1361594880	4886.76	1057.8	2.333
857059982	609106816	-1361595243	4889.12	1057.8	2.333
857059983	609106934	-1361595633	4891.66	1057.8	2.333
857059984	609107042	-1361596022	4894.16	1057.8	2.333
857059985	609107139	-1361596395	4896.52	1058	2.333
857059986	609107242	-1361596761	4898.87	1058	2.333
857059987	609107350	-1361597133	4901.28	1058	2.333
857059988	609107462	-1361597490	4903.62	1058	2.333
857059989	609107567	-1361597861	4906.01	1058	2.333
857059990	609107674	-1361598244	4908.47	1058	2.333
857059991	609107774	-1361598637	4910.96	1058	2.333
857059992	609107886	-1361599025	4913.47	1058	2.333
857059993	609107987	-1361599408	4915.91	1058	2.342
857059994	609108082	-1361599805	4918.4	1058	2.342
857059995	609108180	-1361600198	4920.88	1058	2.342
857059996	609108275	-1361600564	4923.2	1058	2.342
857059997	609108348	-1361600952	4925.58	1058	2.342
857059998	609108430	-1361601333	4927.94	1058	2.342
857059999	609108500	-1361601738	4930.41	1058	2.342
857060000	609108603	-1361602135	4932.92	1058	2.342
857060001	609108713	-1361602526	4935.44	1058	2.351
857060002	609108825	-1361602905	4937.89	1058	2.351
857060003	609108944	-1361603265	4940.28	1058	2.351
857060004	609109044	-1361603631	4942.62	1058	2.351
857060005	609109141	-1361604025	4945.11	1058	2.351
857060006	609109213	-1361604429	4947.57	1058	2.351
857060007	609109308	-1361604826	4950.07	1058	2.351
857060008	609109386	-1361605223	4952.51	1058	2.361
857060009	609109467	-1361605596	4954.82	1058	2.361
857060010	609109558	-1361605959	4957.11	1058	2.361
857060011	609109642	-1361606331	4959.41	1058	2.361
857060012	609109756	-1361606687	4961.75	1058	2.361
857060013	609109849	-1361607060	4964.1	1058	2.361
857060014	609109939	-1361607460	4966.6	1058	2.361
857060015	609109985	-1361607870	4969.04	1058	2.361
857060016	609110031	-1361608277	4971.47	1058	2.361
857060017	609110053	-1361608702	4973.96	1058	2.361
857060018	609110075	-1361609137	4976.52	1058	2.37
857060019	609110109	-1361609553	4978.99	1058	2.37
857060020	609110107	-1361609970	4981.42	1058	2.37
857060021	609110110	-1361610352	4983.67	1058	2.37
857060022	609110147	-1361610712	4985.81	1058.2	2.37
857060023	609110187	-1361611086	4988.04	1058.2	2.361
857060024	609110243	-1361611470	4990.36	1058.2	2.361
857060025	609110309	-1361611849	4992.66	1058.2	2.361
857060026	609110368	-1361612224	4994.93	1058.2	2.361
857060027	609110421	-1361612608	4997.23	1058.2	2.351
857060028	609110486	-1361612992	4999.57	1058.4	2.351
857060029	609110564	-1361613344	5001.75	1058.4	2.351
857060030	609110654	-1361613717	5004.09	1058.4	2.351
857060031	609110760	-1361614092	5006.5	1058.4	2.351
857060032	609110860	-1361614471	5008.92	1058.6	2.351
857060033	609110941	-1361614841	5011.21	1058.6	2.351
857060034	609111032	-1361615210	5013.53	1058.6	2.351
857060035	609111109	-1361615585	5015.83	1058.6	2.351
857060036	609111215	-1361615960	5018.25	1058.8	2.351
857060037	609111298	-1361616331	5020.56	1058.8	2.351
857060038	609111394	-1361616677	5022.78	1058.6	2.351
857060039	609111482	-1361617036	5025.05	1058.6	2.351
857060040	609111573	-1361617398	5027.33	1058.6	2.342
857060041	609111654	-1361617745	5029.5	1058.6	2.342
857060042	609111749	-1361618085	5031.68	1058.6	2.342
857060043	609111860	-1361618439	5034.01	1058.6	2.342
857060044	609111974	-1361618805	5036.41	1058.6	2.342
857060045	609112102	-1361619148	5038.74	1058.6	2.342
857060046	609112213	-1361619492	5041.01	1058.6	2.342
857060047	609112328	-1361619842	5043.33	1058.6	2.342
857060048	609112462	-1361620195	5045.75	1058.6	2.342
857060049	609112585	-1361620575	5048.27	1058.6	2.342
857060050	609112686	-1361620954	5050.68	1058.6	2.342
857060051	609112787	-1361621320	5053.03	1058.6	2.342
857060052	609112860	-1361621678	5055.23	1058.6	2.342
857060053	609112933	-1361622040	5057.45	1058.6	2.342
857060054	609113020	-1361622411	5059.76	1058.6	2.342
857060055	609113117	-1361622758	5061.99	1058.6	2.342
857060056	609113148	-1361623106	5064.05	1058.6	2.333
857060057	609113058	-1361623335	5065.63	1058.6	2.333
857060058	609112948	-1361623299	5066.42	1058.6	2.314
857060059	609112831	-1361623069	5068.1	1058.6	2.305
857060060	609112706	-1361622776	5070.15	1058.6	2.295
857060061	609112563	-1361622446	5072.43	1058.8	2.286
857060062	609112444	-1361622075	5074.87	1058.8	2.277
857060063	609112330	-1361621698	5077.3	1058.8	2.267
857060064	609112218	-1361621320	5079.73	1058.8	2.267
857060065	609112125	-1361620938	5082.14	1058.8	2.258
857060066	609112006	-1361620563	5084.58	1058.6	2.258
857060067	609111915	-1361620148	5087.17	1058.8	2.258
857060068	609111802	-1361619752	5089.7	1058.8	2.258
857060069	609111694	-1361619369	5092.16	1058.8	2.258
857060070	609111585	-1361619009	5094.5	1059	2.249
857060071	609111457	-1361618644	5096.94	1059	2.249
857060072	609111319	-1361618255	5099.55	1059	2.249
857060073	609111188	-1361617887	5102.02	1059	2.249
857060074	609111036	-1361617452	5104.94	1059	2.258
857060075	609110891	-1361617042	5107.7	1059	2.267
857060076	609110738	-1361616626	5110.52	1059	2.286
857060077	609110589	-1361616254	5113.1	1059	2.295
857060078	609110444	-1361615867	5115.74	1058.8	2.305
857060079	609110290	-1361615483	5118.41	1058.8	2.314
857060080	609110157	-1361615088	5121.03	1058.8	2.314
857060081	609110033	-1361614690	5123.64	1058.8	2.323
857060082	609109914	-1361614275	5126.32	1058.8	2.333
857060083	609109811	-1361613870	5128.88	1058.8	2.342
857060084	609109711	-1361613477	5131.37	1058.8	2.351
857060085	609109612	-1361613076	5133.9	1058.8	2.351
857060086	609109527	-1361612667	5136.43	1058.8	2.361
857060087	609109438	-1361612253	5139	1058.8	2.37
857060088	609109355	-1361611836	5141.57	1058.8	2.37
857060089	609109289	-1361611408	5144.15	1058.8	2.379
857060090	609109247	-1361610971	5146.75	1058.8	2.389
857060091	609109207	-1361610537	5149.33	1058.8	2.389
857060092	609109145	-1361610102	5151.95	1058.8	2.398
857060093	609109108	-1361609686	5154.42	1058.6	2.398
857060094	609109061	-1361609282	5156.83	1058.6	2.407
857060095	609109034	-1361608856	5159.35	1058.8	2.407
857060096	609108998	-1361608431	5161.86	1058.8	2.417
857060097	609108998	-1361607995	5164.42	1058.8	2.417
857060098	609108951	-1361607564	5167	1058.8	2.417
857060099	609108894	-1361607146	5169.51	1058.6	2.426
857060100	609108815	-1361606729	5172.06	1058.6	2.426
857060101	609108704	-1361606340	5174.57	1058.6	2.426
857060102	609108604	-1361605962	5176.98	1058.4	2.435
857060103	609108520	-1361605569	5179.42	1058.4	2.435
857060104	609108435	-1361605161	5181.94	1058.2	2.435
857060105	609108368	-1361604763	5184.36	1058.2	2.435
857060106	609108278	-1361604369	5186.82	1058.2	2.435
857060107	609108177	-1361603972	5189.34	1058.2	2.435
857060108	609108051	-1361603589	5191.88	1058.2	2.445
857060109	609107906	-1361603181	5194.63	1058.2	2.445
857060110	609107761	-1361602786	5197.32	1058.2	2.445
857060111	609107635	-1361602393	5199.91	1058.2	2.454
857060112	609107506	-1361601999	5202.51	1058.2	2.454
857060113	609107382	-1361601581	5205.23	1058.2	2.463
857060114	609107262	-1361601182	5207.83	1058.2	2.463
857060115	609107139	-1361600771	5210.5	1058	2.473
857060116	609107022	-1361600376	5213.06	1058	2.482
857060117	609106920	-1361599989	5215.53	1058	2.482
857060118	609106811	-1361599583	5218.12	1058	2.482
857060119	609106715	-1361599194	5220.58	1058	2.491
857060120	609106634	-1361598790	5223.07	1058	2.491
857060121	609106537	-1361598387	5225.6	1058	2.491
857060122	609106418	-1361598000	5228.12	1058	2.491
857060123	609106307	-1361597602	5230.68	1058.2	2.501
857060124	609106181	-1361597177	5233.44	1058.2	2.501
857060125	609106081	-1361596775	5235.98	1058.2	2.501
857060126	609105987	-1361596363	5238.55	1058.2	2.501
857060127	609105924	-1361595944	5241.07	1058.2	2.51
857060128	609105866	-1361595525	5243.55	1058.2	2.51
857060129	609105776	-1361595130	5246.02	1058.2	2.51
857060130	609105695	-1361594756	5248.33	1058.2	2.51
857060131	609105607	-1361594376	5250.7	1058	2.501
857060132	609105505	-1361593983	5253.2	1058	2.501
857060133	609105412	-1361593579	5255.72	1058	2.501
857060134	609105287	-1361593201	5258.22	1058	2.501
857060135	609105152	-1361592818	5260.8	1058	2.501
857060136	609105035	-1361592409	5263.44	1058	2.51
857060137	609104934	-1361592000	5266.02	1058	2.51
857060138	609104819	-1361591615	5268.52	1058	2.51
857060139	609104693	-1361591236	5271.03	1058	2.51
857060140	609104560	-1361590873	5273.51	1058	2.51
857060141	609104421	-1361590510	5276	1058	2.51
857060142	609104270	-1361590168	5278.45	1058	2.51
857060143	609104098	-1361589831	5281	1058	2.51
857060144	609103924	-1361589486	5283.59	1058	2.51
857060145	609103759	-1361589123	5286.22	1057.8	2.519
857060146	609103602	-1361588765	5288.78	1057.8	2.519
857060147	609103443	-1361588411	5291.34	1057.8	2.519
857060148	609103266	-1361588087	5293.86	1057.8	2.519
857060149	609103090	-1361587788	5296.26	1057.8	2.519
857060150	609102942	-1361587452	5298.67	1057.8	2.519
857060151	609102770	-1361587120	5301.2	1057.8	2.519
857060152	609102599	-1361586772	5303.78	1057.8	2.519
857060153	609102450	-1361586430	5306.23	1057.8	2.519
857060154	609102292	-1361586096	5308.68	1058	2.519
857060155	609102147	-1361585773	5311.01	1057.8	2.519
857060156	609101996	-1361585431	5313.47	1057.8	2.51
857060157	609101832	-1361585099	5315.94	1057.8	2.51
857060158	609101668	-1361584757	5318.47	1057.8	2.51
857060159	609101523	-1361584402	5320.95	1057.6	2.51
857060160	609101369	-1361584051	5323.46	1057.6	2.51
857060161	609101223	-1361583705	5325.92	1057.6	2.51
857060162	609101074	-1361583361	5328.37	1057.6	2.51
857060163	609100922	-1361583020	5330.82	1057.6	2.51
857060164	609100800	-1361582668	5333.18	1057.6	2.51
857060165	609100677	-1361582299	5335.63	1057.6	2.51
857060166	609100541	-1361581944	5338.07	1057.6	2.51
857060167	609100429	-1361581560	5340.56	1057.6	2.51
857060168	609100315	-1361581170	5343.08	1057.6	2.51
857060169	609100210	-1361580778	5345.58	1057.6	2.51
857060170	609100101	-1361580415	5347.94	1057.6	2.51
857060171	609099988	-1361580051	5350.33	1057.6	2.501
857060172	609099898	-1361579684	5352.64	1057.6	2.501
857060173	609099811	-1361579304	5355.01	1057.6	2.501
857060174	609099702	-1361578935	5357.41	1057.6	2.501
857060175	609099588	-1361578585	5359.72	1057.6	2.491
857060176	609099484	-1361578221	5362.07	1057.6	2.491
857060177	609099360	-1361577832	5364.63	1057.6	2.491
857060178	609099232	-1361577444	5367.2	1057.6	2.491
857060179	609099095	-1361577059	5369.79	1057.6	2.491
857060180	609098977	-1361576685	5372.25	1057.6	2.491
857060181	609098868	-1361576303	5374.71	1057.6	2.491
857060182	609098754	-1361575922	5377.19	1057.6	2.491
857060183	609098627	-1361575551	5379.67	1057.6	2.491
857060184	609098503	-1361575171	5382.19	1057.4	2.491
857060185	609098390	-1361574784	5384.69	1057.4	2.491
857060186	609098292	-1361574394	5387.16	1057.4	2.491
857060187	609098185	-1361574027	5389.53	1057.4	2.491
857060188	609098075	-1361573653	5391.95	1057.4	2.491
857060189	609097972	-1361573271	5394.39	1057.2	2.491
857060190	609097873	-1361572897	5396.78	1057.2	2.491
857060191	609097750	-1361572530	5399.23	1057.2	2.482
857060192	609097635	-1361572171	5401.59	1057.2	2.482
857060193	609097522	-1361571800	5404.01	1057.2	2.482
857060194	609097402	-1361571428	5406.46	1057.2	2.482
857060195	609097299	-1361571050	5408.88	1057.2	2.482
857060196	609097199	-1361570679	5411.26	1057.2	2.482
857060197	609097092	-1361570298	5413.7	1057.2	2.482
857060198	609097017	-1361569909	5416.09	1057.2	2.482
857060199	609096912	-1361569518	5418.59	1057.2	2.482
857060200	609096813	-1361569123	5421.08	1057.2	2.482
857060201	609096701	-1361568743	5423.54	1057.2	2.482
857060202	609096617	-1361568351	5425.97	1057.2	2.482
857060203	609096530	-1361567944	5428.5	1057.2	2.482
857060204	609096465	-1361567544	5430.93	1057	2.482
857060205	609096377	-1361567152	5433.37	1057	2.482
857060206	609096250	-1361566762	5435.95	1057	2.482
857060207	609096129	-1361566379	5438.46	1057	2.482
857060208	609096001	-1361565981	5441.09	1057	2.482
857060209	609095886	-1361565585	5443.65	1057	2.482
857060210	609095758	-1361565195	5446.24	1057	2.491
857060211	609095632	-1361564835	5448.65	1057	2.491
857060212	609095504	-1361564466	5451.13	1056.8	2.491
857060213	609095368	-1361564098	5453.63	1056.8	2.491
857060214	609095230	-1361563710	5456.24	1056.8	2.491
857060215	609095096	-1361563306	5458.93	1056.8	2.491
857060216	609094953	-1361562932	5461.5	1056.8	2.501
857060217	609094824	-1361562567	5463.95	1056.8	2.501
857060218	609094693	-1361562185	5466.51	1056.8	2.501
857060219	609094551	-1361561796	5469.14	1056.8	2.501
857060220	609094410	-1361561402	5471.8	1056.8	2.501
857060221	609094270	-1361561011	5474.45	1056.8	2.501
857060222	609094130	-1361560625	5477.07	1056.6	2.51
857060223	609093978	-1361560261	5479.63	1056.6	2.51
857060224	609093840	-1361559920	5482.01	1056.6	2.51
857060225	609093722	-1361559549	5484.45	1056.6	2.51
857060226	609093600	-1361559178	5486.91	1056.6	2.51
857060227	609093476	-1361558809	5489.37	1056.6	2.51
857060228	609093356	-1361558453	5491.74	1056.6	2.51
857060229	609093207	-1361558110	5494.19	1056.4	2.51
857060230	609093040	-1361557769	5496.73	1056.4	2.51
857060231	609092851	-1361557422	5499.42	1056.4	2.51
857060232	609092685	-1361557071	5501.99	1056.4	2.51
857060233	609092541	-1361556730	5504.4	1056.4	2.51
857060234	609092398	-1361556389	5506.81	1056.2	2.51
857060235	609092239	-1361556059	5509.25	1056.2	2.51
857060236	609092079	-1361555720	5511.74	1056.2	2.51
857060237	609091910	-1361555397	5514.2	1056.2	2.51
857060238	609091769	-1361555063	5516.57	1056.2	2.51
857060239	609091624	-1361554737	5518.91	1056.2	2.501
857060240	609091471	-1361554400	5521.35	1056.2	2.501
857060241	609091317	-1361554061	5523.81	1056.2	2.501
857060242	609091155	-1361553712	5526.35	1056.2	2.501
857060243	609091003	-1361553377	5528.78	1056.2	2.501
857060244	609090837	-1361553070	5531.15	1056	2.501
857060245	609090678	-1361552758	5533.5	1056	2.501
857060246	609090524	-1361552437	5535.86	1056	2.491
857060247	609090431	-1361552102	5538.01	1056	2.491
857060248	609090301	-1361551755	5540.37	1056	2.482
857060249	609090146	-1361551460	5542.63	1056	2.482
857060250	609089956	-1361551162	5545.11	1056	2.482
857060251	609089765	-1361550859	5547.63	1055.8	2.482
857060252	609089641	-1361550503	5550.02	1055.8	2.482
857060253	609089516	-1361550107	5552.61	1055.8	2.473
857060254	609089389	-1361549733	5555.11	1055.8	2.473
857060255	609089269	-1361549375	5557.49	1056	2.473
857060256	609089132	-1361549042	5559.82	1056	2.473
857060257	609088989	-1361548720	5562.13	1055.8	2.473
857060258	609088864	-1361548403	5564.33	1055.8	2.473
857060259	609088730	-1361548079	5566.61	1056	2.463
857060260	609088583	-1361547757	5568.95	1055.8	2.463
857060261	609088418	-1361547416	5571.47	1055.8	2.463
857060262	609088282	-1361547085	5573.79	1055.8	2.463
857060263	609088138	-1361546736	5576.25	1055.8	2.454
857060264	609087991	-1361546435	5578.48	1055.8	2.454
857060265	609087828	-1361546111	5580.91	1055.8	2.454
857060266	609087652	-1361545814	5583.3	1055.8	2.445
857060267	609087477	-1361545474	5585.87	1055.8	2.445
857060268	609087290	-1361545136	5588.52	1055.8	2.445
857060269	609087103	-1361544770	5591.28	1055.8	2.454
857060270	609086889	-1361544397	5594.24	1055.8	2.454
857060271	609086697	-1361544035	5597.02	1055.8	2.463
857060272	609086498	-1361543662	5599.89	1055.6	2.463
857060273	609086318	-1361543298	5602.61	1055.6	2.473
857060274	609086144	-1361542902	5605.45	1055.6	2.473
857060275	609085974	-1361542493	5608.33	1055.6	2.482
857060276	609085814	-1361542106	5611.04	1055.6	2.482
857060277	609085644	-1361541733	5613.75	1055.4	2.491
857060278	609085470	-1361541376	5616.4	1055.4	2.491
857060279	609085318	-1361541009	5618.97	1055.4	2.501
857060280	609085151	-1361540663	5621.53	1055.4	2.501
857060281	609084984	-1361540285	5624.25	1055.2	2.501
857060282	609084819	-1361539909	5626.94	1055.2	2.51
857060283	609084644	-1361539528	5629.71	1055.2	2.51
857060284	609084474	-1361539152	5632.43	1055.2	2.51
857060285	609084332	-1361538796	5634.9	1055.2	2.519
857060286	609084198	-1361538422	5637.44	1055.2	2.519
857060287	609084056	-1361538033	5640.08	1055.2	2.519
857060288	609083897	-1361537665	5642.69	1055	2.519
857060289	609083745	-1361537303	5645.25	1055	2.529
857060290	609083592	-1361536956	5647.74	1055.2	2.529
857060291	609083446	-1361536622	5650.13	1055.2	2.529
857060292	609083310	-1361536295	5652.42	1055.2	2.529
857060293	609083150	-1361535963	5654.87	1055.2	2.519
857060294	609083028	-1361535679	5656.89	1055.2	2.519
857060295	609082907	-1361535455	5658.62	1055.2	2.51
857060296	609082799	-1361535238	5660.25	1055.2	2.295
857060297	609082682	-1361535012	5661.96	1055.2	2.146
857060298	609082524	-1361534797	5663.89	1055.2	1.978
857060299	609082375	-1361534588	5665.75	1055.2	1.913
857060300	609082248	-1361534384	5667.43	1055.2	1.885
857060301	609082110	-1361534178	5669.19	1055.2	1.838
857060302	609081997	-1361533980	5670.76	1055.2	1.819
857060303	609081857	-1361533764	5672.58	1055.2	1.819
857060304	609081741	-1361533527	5674.35	1055.2	1.819
857060305	609081627	-1361533301	5676.04	1055.2	1.819
857060306	609081496	-1361533052	5677.94	1055.2	1.819
857060307	609081382	-1361532821	5679.66	1055.2	1.81
857060308	609081277	-1361532604	5681.26	1055.2	1.801
857060309	609081175	-1361532370	5682.93	1055.2	1.791
857060310	609081069	-1361532165	5684.49	1055	1.773
857060311	609080986	-1361531952	5685.95	1055	1.764
857060312	609080885	-1361531753	5687.44	1055	1.745
857060313	609080764	-1361531556	5689.06	1055	1.726
857060314	609080628	-1361531352	5690.81	1055	1.717
857060315	609080486	-1361531141	5692.62	1055	1.717
857060316	609080340	-1361530941	5694.41	1055	1.717
857060317	609080181	-1361530766	5696.22	1055	1.717
857060318	609080061	-1361530596	5697.72	1055	1.708
857060319	609079964	-1361530388	5699.22	1055	1.698
857060320	609079878	-1361530175	5700.69	1055	1.689
857060321	609079817	-1361529960	5702.07	1054.8	1.67
857060322	609079759	-1361529785	5703.2	1054.8	1.642
857060323	609079703	-1361529616	5704.31	1054.8	1.596
857060324	609079627	-1361529433	5705.6	1054.8	1.558
857060325	609079539	-1361529234	5707.02	1054.8	1.53
857060326	609079453	-1361529008	5708.56	1054.8	1.521
857060327	609079370	-1361528796	5710.02	1054.8	1.512
857060328	609079295	-1361528601	5711.35	1054.6	1.502
857060329	609079222	-1361528394	5712.74	1054.6	1.493
857060330	609079148	-1361528175	5714.2	1054.6	1.484
857060331	609079080	-1361527960	5715.6	1054.6	1.474
857060332	609078993	-1361527750	5717.07	1054.6	1.465
857060333	609078913	-1361527499	5718.73	1054.6	1.465
857060334	609078834	-1361527253	5720.34	1054.8	1.465
857060335	609078750	-1361527027	5721.88	1054.8	1.465
857060336	609078666	-1361526833	5723.26	1054.8	1.465
857060337	609078614	-1361526620	5724.61	1054.8	1.465
857060338	609078558	-1361526436	5725.8	1054.6	1.456
857060339	609078462	-1361526259	5727.18	1054.6	1.437
857060340	609078364	-1361526073	5728.6	1054.6	1.437
857060341	609078246	-1361525885	5730.15	1054.6	1.437
857060342	609078136	-1361525676	5731.76	1054.6	1.446
857060343	609078030	-1361525486	5733.25	1054.6	1.446
857060344	609077927	-1361525288	5734.75	1054.6	1.446
857060345	609077828	-1361525085	5736.26	1054.6	1.446
857060346	609077717	-1361524873	5737.88	1054.6	1.446
857060347	609077606	-1361524681	5739.41	1054.6	1.456
857060348	609077508	-1361524463	5740.98	1054.6	1.456
857060349	609077426	-1361524256	5742.4	1054.6	1.465
857060350	609077331	-1361524066	5743.83	1054.6	1.465
857060351	609077204	-1361523841	5745.59	1054.6	1.465
857060352	609077063	-1361523584	5747.58	1054.4	1.484
857060353	609076910	-1361523301	5749.77	1054.4	1.512
857060354	609076760	-1361523006	5751.99	1054.4	1.549
857060355	609076620	-1361522701	5754.21	1054.4	1.586
857060356	609076486	-1361522379	5756.48	1054.4	1.726
857060357	609076328	-1361522066	5758.83	1054.4	1.913
857060358	609076170	-1361521745	5761.22	1054.4	2.062
857060359	609076004	-1361521418	5763.69	1054.4	2.137
857060360	609075818	-1361521074	5766.35	1054.4	2.183
857060361	609075660	-1361520715	5768.92	1054.6	2.23
857060362	609075507	-1361520377	5771.37	1054.6	2.267
857060363	609075340	-1361520058	5773.81	1054.4	2.277
857060364	609075168	-1361519727	5776.33	1054.4	2.305
857060365	609074977	-1361519415	5778.88	1054.4	2.323
857060366	609074773	-1361519107	5781.51	1054.4	2.351
857060367	609074564	-1361518812	5784.12	1054.6	2.37
857060368	609074357	-1361518524	5786.68	1054.6	2.389
857060369	609074162	-1361518198	5789.32	1054.6	2.407
857060370	609073969	-1361517895	5791.84	1054.6	2.426
857060371	609073793	-1361517555	5794.42	1054.6	2.445
857060372	609073610	-1361517231	5796.98	1054.6	2.454
[truncated: 1,246 more rows]
