# Supplementary material for: New Considerations for Collecting Biomechanical Data Using Wearable Sensors: How Does Inclination Influence the Number of Runs Needed to Determine a Stable Running Gait Pattern?
Source: Sensors (Basel). 2019 Jun 1;19(11):2516. doi: 10.3390/s19112516 (PMC6603692; doi:10.3390/s19112516)
Supplement: Supplementary file 1 [file sensors-19-02516-s001.zip › Suppl/Sample Data From Lumo Wearable.csv]

Time (s)	Cadence (spm)	Bounce (cm)	Braking (m/s)	Drop (°)	Rotation (°)	GCT (ms)
0	0	0	0	0	0	0
27	174	5.4	0.25	5.8	11.5	255
30	171	5.8	0.25	6.3	11.1	260
45	176	5.3	0.26	5.1	10	254
54	172	5.8	0.31	5.5	11.7	257
67	175	5.4	0.26	5.2	10.5	253
71	174	5.6	0.25	5.4	12	253
74	173	5.7	0.24	5.6	12.5	257
78	169	5.9	0.23	5.2	12.4	265
81	169	5.9	0.27	5.7	11.2	265
85	170	5.8	0.27	5.4	11.6	262
101	173	5.9	0.28	6	15.4	258
105	172	5.9	0.26	5.4	13.6	258
108	171	5.9	0.27	5.7	12.8	259
112	173	5.8	0.26	5.8	12.5	254
115	170	5.9	0.25	6	11.9	258
119	172	5.9	0.27	5.9	11.3	257
122	172	5.5	0.26	5.8	12.5	257
126	171	6	0.25	5.6	14.1	257
129	174	5.9	0.29	5.4	12.7	258
133	171	5.8	0.24	5.9	13	254
136	171	5.9	0.25	5.1	11.7	262
140	170	6.1	0.26	5.3	12.5	256
143	172	5.8	0.26	5.9	12.3	255
147	172	5.9	0.27	5.2	13.1	254
150	172	6	0.28	5.4	13.7	255
154	172	5.9	0.27	6.1	12.7	254
157	173	5.9	0.28	5.5	12.7	252
161	175	5.6	0.26	5.2	12	255
164	172	6	0.27	5.7	13.1	257
168	173	5.9	0.25	5.2	13.3	256
171	175	5.4	0.25	5.2	12.6	250
175	172	5.8	0.26	5.6	13.8	255
178	171	5.8	0.25	5.7	13.5	256
182	173	5.7	0.26	5.6	13.8	256
185	173	5.6	0.25	6	12.5	256
189	171	5.7	0.24	5.6	12.6	257
192	173	5.5	0.25	6.1	13.1	257
196	170	6	0.25	5.9	13.8	260
199	173	5.8	0.25	6	13.2	256
203	173	5.7	0.29	4.7	14.6	254
206	172	5.9	0.3	5	16.6	252
209	173	6.2	0.3	5.5	17.1	252
213	172	6.1	0.28	4.6	16.7	254
216	172	6.1	0.26	5.1	17.3	252
220	155	6.3	0.27	5.6	19.8	325
224	173	6	0.26	5.8	13.2	258
227	173	6	0.27	5.7	14.3	255
231	171	6.2	0.27	6.7	14.1	257
234	172	6.1	0.27	5.6	13.5	255
238	169	6.2	0.27	6.2	14.9	258
241	173	6.1	0.29	6.1	14.4	255
245	169	6.7	0.29	6	15.5	259
248	175	6.1	0.27	5.9	14.4	251
252	175	6.2	0.27	5.8	15.7	250
255	173	6.2	0.29	6.1	14.7	255
259	171	6.6	0.33	6.1	14	256
262	172	6.5	0.31	5.6	14.6	251
266	171	6.3	0.29	5.5	14.9	251
269	171	5.6	0.24	5	20.5	253
273	174	5.5	0.22	5.6	21.4	240
276	169	6.1	0.25	6.4	15.9	263
280	173	5.9	0.25	7.3	11.4	260
283	172	5.6	0.24	7.7	11.6	259
287	170	5.8	0.24	6.5	11.9	260
290	172	6.3	0.27	6.2	13.8	262
294	153	6.4	0.29	5.1	18.2	323
299	171	6.6	0.36	5.7	15.6	264
302	169	6.9	0.41	5.4	14.7	252
306	170	7.1	0.37	6.2	13.6	258
309	174	6.5	0.3	6.6	14.8	251
313	172	5.6	0.27	8.2	13	256
326	169	6.5	0.35	5.4	12.2	262
329	171	6.4	0.35	5.5	13.1	256
333	171	6.7	0.37	5.8	14.5	259
336	173	7	0.39	5.5	14.1	252
340	171	6.5	0.31	5.6	14.4	253
343	173	6.3	0.27	5.4	13.9	254
347	172	6.3	0.26	5.7	14.8	258
350	172	6.6	0.31	6.1	15.4	247
354	171	6.7	0.29	5.9	15	252
357	173	6.6	0.29	6.3	15.6	253
361	173	6.2	0.27	6.4	13.3	252
364	173	6.2	0.29	6.2	13	249
368	172	6.4	0.29	6.3	14.2	254
371	173	6.4	0.28	6.1	14.5	251
374	174	6.2	0.3	6	14	251
378	174	6.3	0.29	5.6	14.3	249
381	172	6.2	0.29	6.5	15.9	250
385	173	6.5	0.29	6.1	15	253
388	170	6.5	0.29	6.4	14.2	255
392	173	6.5	0.26	6.6	14.3	251
396	156	6.6	0.29	6.4	16	317
399	173	6.3	0.29	6.7	14	249
403	177	6	0.28	6.9	13.7	242
406	160	5.8	0.29	6.5	13.6	311
410	176	5.8	0.29	6.7	15.3	245
413	173	6	0.27	6.4	15.7	252
417	174	5.5	0.25	6.9	14.2	252
420	174	5.7	0.24	7.6	14.2	252
424	174	5.9	0.26	6.5	13.7	257
427	157	6.2	0.29	6	14.3	316
431	174	6.5	0.3	6.4	14.4	249
435	157	6.4	0.29	5.9	14.8	285
438	174	6.3	0.28	5.9	15	248
441	174	6.7	0.31	6.7	15.1	248
445	174	6.5	0.28	6	19.5	247
448	173	6.6	0.3	6.5	17.7	249
452	175	6.7	0.32	6.6	15	249
455	172	6.5	0.29	6.1	15.2	255
459	177	6.3	0.28	6.6	15.9	246
462	173	6.8	0.31	6.5	15.2	252
467	178	6.1	0.28	6.6	15.6	244
470	176	6.4	0.29	6.5	16.1	245
473	178	6.4	0.3	6	16.9	241
477	176	6.6	0.28	6.3	16.9	244
480	175	6.4	0.27	5.8	14.5	245
484	173	6.7	0.29	6.2	15.3	250
487	174	6.5	0.29	6.3	15.2	248
491	173	6.6	0.3	6.2	14.7	247
494	172	6.8	0.3	6.3	15.5	254
497	176	6.7	0.31	6.7	14.6	246
501	157	6.7	0.29	7.3	15.9	319
505	174	6.3	0.28	6.7	16.1	250
508	175	6.1	0.29	6.2	16	245
512	172	6.3	0.31	6.4	13.9	251
515	176	6.5	0.31	5.7	14.4	243
519	174	6.3	0.32	6	15.4	245
522	175	6.3	0.31	6.1	16.4	249
525	171	6.4	0.29	6.1	16	254
529	176	6.2	0.32	5.8	15	248
532	171	6.7	0.32	5.9	16	252
536	177	6.2	0.3	5.6	16	241
540	175	6.3	0.32	5.5	15.5	248
544	175	6.6	0.31	5.7	15.9	251
547	175	6.3	0.3	5.9	17.4	246
551	173	6.4	0.28	5.6	15	252
554	172	6.5	0.26	5.7	15.3	252
558	174	5.9	0.26	5.6	15.5	251
561	174	6	0.26	5.3	14.8	250
564	176	5.7	0.28	5.3	16.2	246
568	176	6.1	0.28	5.5	16.4	251
573	159	6	0.27	5.4	15.4	253
576	175	6.2	0.28	5.3	15.3	247
580	175	6.2	0.28	5.3	15.1	251
583	174	6.4	0.29	5.6	16.7	247
587	174	5.9	0.26	6.4	16.4	249
590	179	5.8	0.27	5.8	16.3	238
593	177	5.8	0.26	6	16.3	244
597	179	5.8	0.27	5.3	17	240
600	171	5.9	0.25	6.3	14.7	255
674	173	5.7	0.3	5.5	14.3	249
677	173	5.9	0.32	4.8	13.8	253
681	156	6	0.33	5.4	14.8	324
684	173	6.1	0.34	4.8	14.7	253
688	177	5.8	0.34	4.8	13.9	244
691	176	6.1	0.33	5.2	14.5	248
695	173	6.3	0.32	5.2	14.6	248
698	176	6	0.32	5.5	13.7	245
702	175	6.2	0.31	5.4	14.9	247
705	179	6	0.32	5.8	16.1	240
708	181	5.8	0.35	5.6	15.5	238
712	176	6.2	0.32	6.9	17	244
715	176	6.3	0.34	6.6	15.6	244
718	180	6.3	0.33	6.4	15.5	240
722	176	6.3	0.3	6.3	15.4	244
725	177	5.9	0.3	6.6	16	247
729	177	5.9	0.32	6	15.2	244
732	176	6.4	0.32	7.2	20.9	242
735	177	5.8	0.28	5.9	17.6	249
739	179	5.9	0.29	5.8	19.2	245
742	177	6.1	0.29	5.7	20.2	247
746	173	6.3	0.28	6.3	17.5	246
749	182	5.8	0.29	6.8	15.6	242
752	175	6.2	0.3	6.3	15.8	245
756	178	5.9	0.28	6.8	15.1	241
759	179	5.9	0.29	7	15.2	240
762	181	5.9	0.29	6.4	16.2	237
767	143	6.3	0.31	6.9	15.1	279
770	179	6.1	0.3	6.6	14.9	272
773	177	6.3	0.29	6.7	16.1	244
777	177	6.1	0.29	6.4	15.2	242
780	176	6.3	0.28	7.7	17	245
784	177	6.1	0.29	6.7	16.9	245
787	176	5.9	0.26	6.3	14	246
790	176	6.1	0.28	6.4	15.7	245
794	176	5.9	0.27	6.6	16.2	246
798	176	6.1	0.29	6.7	17.2	248
802	177	6.2	0.29	6	17.5	242
805	173	6.4	0.33	6.6	18.7	251
809	175	6.7	0.33	6.2	18.2	245
812	172	7.1	0.32	6.7	17.7	249
815	176	6.5	0.33	5.9	14.9	242
819	174	6.5	0.3	6	16.3	246
822	176	6.7	0.3	6.4	17.2	243
826	175	6.7	0.3	6.4	15.5	248
829	177	6.5	0.29	6.2	17.6	246
832	177	6.1	0.3	6.1	16	243
836	175	6.2	0.29	5.7	18.8	248
839	174	6.5	0.33	5.5	15.3	246
843	177	6.6	0.33	6.2	17.5	246
846	176	6.8	0.34	6.2	18.3	245
850	177	6.6	0.35	5.9	15.7	239
853	179	6.3	0.33	5.9	17.4	239
856	177	6.4	0.31	5.9	16.6	246
860	174	6.5	0.28	6.8	16.8	247
863	178	6.3	0.3	6.1	16.8	239
867	175	6.6	0.32	6.1	16.8	244
870	156	6.9	0.32	6.3	16.6	320
874	174	6.8	0.31	6.5	17.4	249
877	174	6.8	0.29	5.8	17.4	250
881	175	6.4	0.28	6.1	17.5	247
884	172	6.5	0.27	6.4	16	253
888	174	6.6	0.28	6.7	16.9	249
891	174	6.7	0.3	6.6	17.2	250
894	179	5.8	0.27	5.7	14.7	243
898	175	6.1	0.27	6.6	16.8	248
901	178	6	0.27	5.9	16.6	244
905	177	5.9	0.27	5.6	15.9	246
908	173	6.4	0.27	6.1	17.4	254
912	173	6.2	0.24	6.6	16.6	250
915	176	5.9	0.25	7.6	15.9	244
918	175	6.1	0.26	7.6	15.5	243
922	157	6.5	0.26	7.4	16.9	285
926	175	6.2	0.28	7.5	16.7	249
929	172	6.1	0.25	7	16.1	257
933	173	6.5	0.26	6.6	16	251
936	175	6	0.27	6	18.4	247
939	175	6.2	0.26	6.1	17.7	248
944	176	5.9	0.25	6.2	16.3	247
947	175	6.1	0.27	6.5	18	250
951	175	6.4	0.28	5.8	16.9	248
954	168	7.4	0.3	6.7	19.6	261
958	169	7.4	0.32	6.7	19	259
961	173	6.9	0.31	6.5	17.5	250
965	175	6.6	0.3	6.6	17.5	248
968	172	7	0.31	6.4	15.7	250
972	172	6.9	0.3	7.1	17.4	252
975	173	6.4	0.29	6.3	17.5	246
979	177	6.2	0.27	6.1	17.6	248
982	174	6.6	0.29	6.1	18.1	248
986	177	6.6	0.34	6.3	18.3	237
989	176	7.1	0.35	6.3	17.5	246
992	174	7.2	0.33	6.4	17.2	245
996	174	6.7	0.27	6.7	17.9	249
999	173	7	0.27	7.7	18.3	250
1003	176	6.4	0.28	6.8	17	246
1006	175	6.5	0.27	7.2	18.8	249
1010	178	6.2	0.28	6.7	17.8	238
1013	176	6.2	0.27	7	17.4	245
1016	177	6.1	0.29	6.5	16.1	240
1020	177	6.1	0.29	6.6	17.9	245
1023	175	6.6	0.3	6.6	16.9	248
1027	175	6.2	0.29	6.5	17	246
1030	175	6	0.29	7.3	16.5	250
1034	174	6.2	0.3	7	15.9	247
1037	172	6.5	0.3	7	17.4	254
1040	174	6.7	0.31	6.9	16.4	247
1044	172	6.7	0.29	6.7	17.4	249
1047	173	6.5	0.28	7.2	16.1	251
1051	176	6.2	0.27	7.9	15.2	248
1054	175	5.9	0.26	8.9	15.7	247
1058	173	6	0.27	10.4	16.9	245
1061	172	6.1	0.28	9.6	17.8	250
1065	177	5.8	0.28	9.1	15.8	249
1068	176	6.1	0.26	7.6	16.7	248
1072	166	6.6	0.25	6.8	16.8	267
1075	174	6.1	0.25	6.3	17.1	246
1079	173	6.4	0.29	6	17.4	250
1082	171	6.5	0.27	6.5	18.5	254
1086	174	6.3	0.28	5.8	16.5	249
1089	172	6.4	0.29	5.9	17.5	251
1093	172	6.5	0.33	6.1	18.3	252
1096	175	6.8	0.33	6.2	16.7	251
1099	172	7	0.32	7.1	18.7	254
1103	176	6.7	0.32	6.1	17.8	244
1106	179	6.5	0.3	5.9	16.1	237
1110	176	6.6	0.31	6.1	18.2	244
1113	177	6.4	0.32	6.3	16.3	244
1116	175	6.7	0.34	6.4	18.1	246
1120	179	6.3	0.3	5.8	14.7	237
1123	178	6.3	0.29	6.3	17.1	243
1127	174	6.5	0.29	5.7	15.4	249
1130	177	5.9	0.28	5.4	15.2	244
1133	176	6.3	0.3	5.9	17.3	243
1137	175	6.2	0.27	5.5	17	247
1140	177	6.2	0.28	5.8	16.6	242
1144	180	5.7	0.28	5.5	15.3	240
1147	177	6.1	0.29	5.7	16	243
1150	175	6.2	0.26	5.4	20	245
1154	175	6.1	0.28	6	17.2	248
1157	176	6.1	0.27	5.5	16.2	242
1161	176	6.1	0.26	5.9	15.8	246
1164	175	6	0.28	6.2	16.6	244
1168	176	6.2	0.27	6.5	16.5	247
1171	176	6.4	0.29	6.2	20.5	245
1174	176	6.3	0.3	5.7	18.3	244
1178	179	5.8	0.27	4.7	19.9	244
1181	179	5.9	0.27	5	21.6	241
1184	174	6.2	0.26	5.7	20.7	247
1188	178	6.1	0.27	6.2	16.2	247
1191	177	5.9	0.27	5.9	17.3	246
1195	178	6	0.3	5.7	15.5	242
1198	178	5.9	0.29	5.6	16.1	243
1201	179	6.1	0.28	6.3	15.7	241
1205	177	6.3	0.28	6.3	16.9	245
1208	173	6.6	0.29	6.3	17.1	247
1212	176	6.5	0.29	5.7	17.2	241
1215	177	6.2	0.28	6.1	17.1	247
1218	176	6.2	0.27	6	16	246
1222	176	6	0.24	5.8	15.7	247
1225	175	6.3	0.28	6.6	16.5	247
1229	178	5.8	0.27	6	17.1	243
1232	177	6	0.27	5.9	16.5	245
1235	176	6.4	0.3	6.2	17.8	244
1239	178	6.2	0.3	6.4	17.4	243
1242	176	6.1	0.28	5.9	16.4	242
1246	177	6.2	0.28	5.7	15.9	244
1249	178	6.1	0.28	6	15.3	243
1252	176	6.2	0.26	6.3	16.8	245
1256	180	5.8	0.27	6.3	16	238
1337	175	6	0.27	5.1	17	247
1340	178	5.6	0.29	5	19.1	238
1343	179	6.1	0.31	4.9	15.5	248
1347	178	6	0.32	4.9	16.4	240
1350	180	5.7	0.3	5	15.6	236
1353	179	5.7	0.31	4.8	14.7	238
1357	181	5.7	0.3	4.6	13.7	236
1362	158	5.9	0.27	4.9	14	281
1365	177	6.1	0.3	5.7	15.6	276
1368	179	5.8	0.28	4.7	13.9	244
1372	175	6	0.26	4.7	15.8	248
1375	176	5.7	0.25	4.3	16.2	246
1379	176	5.8	0.27	5.3	16.8	249
1382	176	6.4	0.29	4.8	16.7	246
1385	175	6.5	0.3	6.1	16.2	245
1389	179	5.9	0.3	5.5	16.3	237
1392	178	5.9	0.29	5.5	15.6	236
1396	175	5.9	0.29	5.7	15.7	246
1399	175	6	0.3	5.5	14.2	248
1402	177	5.9	0.29	4.8	14.6	238
1406	177	5.6	0.26	5.1	16.4	240
1409	178	5.8	0.3	5	14.4	240
1413	177	5.7	0.27	5.3	14.8	249
1416	177	5.5	0.28	5.2	15.5	244
1419	177	5.7	0.27	5.4	16.4	246
1423	177	5.8	0.28	5.6	16.3	244
1426	176	5.8	0.29	4.9	15.9	247
1430	175	6.1	0.28	5.3	17.7	250
1433	177	5.9	0.26	4.3	15.6	244
1436	177	6	0.27	5.4	18	244
1440	177	5.4	0.24	5.1	17.3	246
1443	175	5.7	0.25	4.7	17.2	249
1447	179	5.4	0.23	5.3	17.2	247
1450	178	5.4	0.24	4.7	15.3	247
1453	180	5.6	0.25	4.7	17.1	241
1457	176	5.6	0.23	4.9	17.9	249
1460	177	5.7	0.25	5.8	16.6	250
1464	174	5.6	0.25	5.2	16.5	252
1467	175	5.8	0.26	4.5	14.8	252
1470	177	5.6	0.26	5.1	18.1	246
1474	180	5.5	0.25	4.7	15.4	242
1477	176	5.9	0.27	5.7	16.4	248
1481	175	6.2	0.25	6	16.1	251
1484	176	6	0.25	5.4	14.2	246
1487	175	5.9	0.27	6.1	15.3	253
1491	176	5.9	0.23	6.2	15.5	249
1494	176	6.1	0.24	6	15.1	248
1498	177	5.8	0.24	6	16.3	245
1501	179	5.3	0.21	4.7	14.6	245
1504	175	5.7	0.24	5.3	16.6	250
1508	173	5.7	0.24	5.5	14.7	252
1511	177	5.7	0.25	4.9	16.3	250
1515	174	6	0.26	5.6	17.5	250
1518	176	5.8	0.25	5.2	16.5	248
1522	173	6	0.25	5.6	16.6	252
1525	177	5.7	0.26	5	18.3	247
1528	177	5.6	0.25	5.8	17.1	249
1532	177	5.9	0.27	5.9	16	246
1535	177	6	0.26	5.8	17.8	245
1539	177	5.8	0.25	5.9	16.6	247
1542	175	5.8	0.25	5.4	15.7	249
1545	178	5.8	0.25	5.4	16.8	246
1549	177	5.9	0.24	5.8	14.9	248
1552	175	5.9	0.23	5.6	14.5	251
1556	175	6.2	0.25	5.8	15.4	249
1559	176	6.1	0.24	6.2	15.8	250
1562	173	6.3	0.25	6.5	15.8	253
1566	174	6.6	0.25	6.4	16.3	253
1569	173	6.6	0.28	5.9	17.5	254
1573	173	6.7	0.28	6.2	17.5	250
1576	171	6.8	0.29	6.2	17.7	253
1580	175	6.5	0.28	5.7	17.3	248
1583	175	6.4	0.27	5.7	15.6	247
1587	170	6.8	0.26	6.1	17.1	255
1590	174	6.6	0.27	6.5	17.4	247
1594	176	5.9	0.24	5.1	17.2	247
1597	176	5.8	0.25	5.4	17.1	249
1600	178	5.9	0.26	5.5	15.8	241
1604	176	6.2	0.27	5.8	17.7	245
1607	173	6	0.26	5.4	16.4	251
1611	176	5.9	0.26	5.7	16.2	250
1615	176	6.1	0.3	5.6	16.7	245
1619	176	5.9	0.27	4.9	15.6	247
1622	178	5.9	0.28	5.2	16.7	242
1625	175	6.2	0.29	5.4	17.4	249
1629	175	6.6	0.28	6.3	19	248
1632	174	6.8	0.3	6.3	17.6	247
1636	175	6.7	0.3	6.3	18.3	247
1639	175	6.5	0.28	6	17.8	249
1643	177	5.9	0.28	5.1	18.9	244
1646	176	6.3	0.27	6.1	18.3	248
1649	175	6	0.26	5.2	20.8	252
1653	173	6.2	0.24	5.4	16	254
1656	175	5.8	0.24	5.7	16.7	254
1660	173	6	0.25	5.2	17.3	255
1663	175	6	0.27	5.6	17.6	248
1667	177	5.8	0.26	5.2	16.8	247
1670	173	6.1	0.28	5.8	16.5	253
1673	177	5.9	0.27	5.2	15.8	245
1677	175	6.1	0.26	5.6	17.7	248
1680	175	6.5	0.28	5.4	16.3	245
1684	173	6.6	0.26	5.9	16.3	253
1697	158	7.4	0.29	7.1	21.7	293
1700	174	6.5	0.3	5.2	21.8	246
1704	173	6.6	0.29	6.2	19.2	251
1707	172	6.7	0.3	6.3	17.3	252
1711	175	6.4	0.29	6	18.2	251
1714	175	6.6	0.31	6.3	17	249
1718	175	6.6	0.3	6.1	16.7	246
1721	175	6.7	0.31	6.2	17.7	244
1724	177	6.7	0.32	6.2	17.4	240
1728	176	6.6	0.32	5.8	19.4	243
1731	176	6.6	0.3	6.1	20.8	244
1735	178	6.7	0.32	5.9	22.2	244
1738	173	7	0.3	6.8	20.3	247
1742	177	6.7	0.32	6.2	18.8	243
1745	176	6.7	0.3	6.4	18.2	245
1748	176	6.5	0.31	5.9	18.6	245
1752	177	6.4	0.3	6.2	20.7	246
1755	176	6.4	0.31	6	19.9	244
1759	176	6.5	0.31	6.2	21.1	244
1762	175	6.9	0.33	6.4	19.4	248
1765	177	6.4	0.31	5.9	20.2	245
1769	175	6.6	0.3	5.8	20	247
1772	175	6.6	0.31	6.4	21.6	246
1776	178	6.4	0.31	5.8	19.9	242
1779	176	6.5	0.3	6.1	20.1	248
1782	175	6.6	0.29	6.1	19.4	246
1787	176	6.2	0.29	6.1	17.7	246
1790	177	6.3	0.29	5.7	17.4	243
1794	175	6.6	0.3	5.9	17.8	248
1797	177	6.7	0.31	6	17.9	245
1801	177	6.8	0.29	6.4	18.3	245
1804	175	6.9	0.3	6.4	17.3	245
1807	177	6.8	0.31	6.3	17.5	239
1811	176	6.8	0.3	6.3	18	245
1814	176	6.7	0.3	6.5	16.7	247
1818	174	6.8	0.3	6.4	16.9	248
1821	174	6.5	0.28	6.3	16.2	249
1824	176	6.3	0.29	5.8	16.1	247
1828	176	6.3	0.29	5.9	17.2	248
1831	177	6.2	0.29	5.9	16.6	245
1835	177	6.4	0.3	6.4	21.6	246
1838	178	6.4	0.3	6.1	17.3	240
1841	176	6.6	0.31	6.1	17.6	242
1846	176	6.7	0.3	6.4	19.2	243
1849	177	6.6	0.33	6.2	20.3	242
1853	176	6.7	0.32	5.8	18.4	246
1856	177	6.3	0.3	6.4	16.9	242
1860	176	6.7	0.31	6.6	19.6	244
1863	176	6.6	0.31	6.2	17.5	245
1866	177	6.6	0.31	6.7	18.4	241
1870	174	6.6	0.29	6.4	18.7	247
1873	176	6.6	0.31	6.5	17.5	243
1877	173	6.7	0.29	6.6	19.4	253
1880	176	6.4	0.32	6.6	19.6	246
1883	177	6.3	0.32	6.5	18.9	242
1887	177	6.7	0.3	6.3	19.4	245
1890	179	6.6	0.32	6.3	17.6	239
1894	176	6.8	0.33	6.2	19.3	244
1897	175	7	0.34	6.6	20.1	248
1900	176	6.5	0.33	6.4	18.8	243
1904	179	6.3	0.34	6.1	20.2	237
1907	181	6	0.33	5.9	18.1	239
1910	181	5.9	0.34	6.5	18.4	235
1914	179	6.2	0.34	5.7	17.6	240
1917	180	6.1	0.33	6.1	18.8	237
1920	177	6.7	0.36	6.4	20.2	241
1989	175	6.1	0.27	5.2	16.4	247
1992	178	5.9	0.3	5	16.1	241
1996	177	6.2	0.31	5.9	15.9	245
1999	175	6.2	0.28	5.7	17.2	252
2003	177	6.4	0.31	5.6	17.2	241
2006	179	6	0.29	5	17.9	239
2009	179	6	0.29	5.1	15.9	241
2013	179	6.3	0.31	5	15.2	237
2016	180	6	0.31	5.2	16.5	238
2019	181	5.9	0.29	4.1	16.3	238
2023	178	6	0.28	4.9	16.1	242
2026	181	6	0.28	5	15.6	237
2029	180	5.8	0.26	4.5	16.5	238
2033	178	5.5	0.23	4.6	16.5	246
2036	180	5.7	0.25	4.6	17.7	244
2039	180	5.6	0.25	4.6	16.6	242
2043	180	5.5	0.25	4.7	16	239
2046	181	5.3	0.25	4.6	15.8	241
2049	180	5.8	0.28	4.6	15.6	236
2053	176	6.1	0.26	5.7	16	246
2056	176	6.1	0.26	5.7	18.2	248
2060	173	6.2	0.26	6.2	15.7	250
2063	175	6.2	0.24	5.6	14.7	249
2066	176	5.9	0.24	5.2	14.8	251
2070	179	5.6	0.24	5.7	13.9	242
2073	177	6	0.24	5.1	14.3	246
2077	178	5.7	0.25	5.5	14.7	245
2080	179	6	0.26	5.5	16.1	242
2083	180	5.4	0.26	5.4	13.2	239
2087	179	5.4	0.24	5.1	15	244
2090	180	5.4	0.24	5	13.9	242
2093	182	5.6	0.27	5.2	15.8	239
2097	180	5.7	0.26	5	16.7	239
2100	179	5.8	0.25	5.3	16.3	241
2103	178	5.9	0.26	5.3	15.4	246
2107	180	5.6	0.27	4.7	17.7	243
2110	179	5.7	0.25	4.9	15.6	243
2113	180	5.9	0.29	5.7	15.8	239
2117	181	6	0.28	5.9	16.8	239
2120	177	6.3	0.26	5.9	16	244
2123	179	5.8	0.26	5.2	16.1	242
2127	179	6	0.27	5.6	16.2	242
2130	176	6.1	0.25	5.2	15.5	248
2134	179	5.6	0.24	4.6	16.9	243
2137	180	5.8	0.25	4.8	17.2	240
2140	177	5.8	0.24	5	17	249
2144	181	5.6	0.25	5.3	16.9	238
2147	183	5.5	0.24	4.5	18	237
2150	177	6	0.26	4.9	17.5	247
2154	178	5.6	0.24	5.1	16	247
2157	176	5.7	0.25	5.1	17.4	248
2161	175	6.3	0.26	5.4	16.4	248
2164	173	6.4	0.25	5.3	17.1	250
2167	173	6.4	0.22	5.6	17.5	252
2171	177	5.8	0.26	5.2	16	247
2174	174	6.3	0.24	5.8	16.8	250
2178	172	6.5	0.23	5.4	17.2	254
2181	176	5.8	0.23	5.2	15.8	249
2185	179	5.1	0.22	4.6	14.3	245
2188	178	5.5	0.23	5	17	244
2191	177	5.2	0.22	4.9	16.1	250
2195	175	5.5	0.23	4.8	17.7	251
2198	174	6	0.24	4.7	18	254
2202	174	5.7	0.22	5.2	17.9	254
2205	176	5.8	0.22	5.5	17.4	251
2209	173	6	0.23	5	17.3	254
2212	176	6.2	0.26	5.4	15.9	247
2215	173	6.6	0.27	5.5	16.4	253
2219	174	6.2	0.25	5.8	17.7	251
2222	175	6.6	0.29	5.7	15.5	246
2226	175	6.6	0.29	6	16.4	243
2229	175	6.7	0.29	5.9	15.2	244
2233	175	6.6	0.29	6.4	16.9	245
2236	175	6.6	0.28	5.8	19.1	249
2239	178	6.5	0.27	5.5	18.2	241
2243	178	6.3	0.26	5.6	18	240
2246	180	6.1	0.26	5.4	17.4	240
2249	177	6.5	0.28	5.7	20.5	246
2253	181	6.1	0.29	5.6	17	237
2256	180	6.3	0.31	5.6	19	239
2259	178	6.4	0.28	5.8	18.5	243
2263	176	6.3	0.28	5.2	18.9	246
2266	177	6.2	0.29	5	17.3	245
2270	178	6.4	0.32	5.2	19.7	244
2273	177	6.5	0.29	5.5	18.3	241
2276	176	6.7	0.28	5.5	18.2	249
2280	176	6.5	0.26	5.8	17.8	247
2283	176	6.3	0.27	6	18	246
2287	174	6.6	0.27	6.1	17.1	249
2290	173	6.5	0.24	6.1	17.6	248
2294	177	6.4	0.23	4.6	17.7	246
2297	180	5.4	0.24	4.7	18.5	236
2301	162	5.1	0.24	4.3	19.6	274
2304	177	5.6	0.26	5.8	20.1	246
2307	178	6.1	0.29	5.5	19.4	245
2311	178	6.3	0.3	5.6	18	246
2314	179	6	0.25	6.2	18.3	242
2317	176	6.3	0.25	6.1	18.3	247
2321	177	6.2	0.28	5.3	18.1	246
2325	178	5.7	0.27	5.2	19.7	243
2329	178	6.4	0.3	7.3	19.3	244
2332	176	6.5	0.28	6.8	20.2	248
2335	174	6.8	0.28	6.8	18.7	250
2339	175	6.8	0.28	6.2	18.2	248
2342	175	6.9	0.29	6	18.4	243
2346	177	6.5	0.27	5.9	17.6	244
2349	176	6.2	0.26	6	18.2	250
2353	176	6.4	0.3	6.1	18.2	248
2357	177	6.5	0.32	6.1	19.4	244
2360	176	6.6	0.3	6.4	17.9	243
2364	172	6.7	0.28	6.4	18.3	253
2367	173	7	0.28	6.2	20.6	250
2371	174	6.9	0.3	6.2	17.6	249
2374	171	6.8	0.26	6.3	16	253
2378	174	6.7	0.26	6.4	17.1	250
2381	175	6.4	0.26	5.9	15.9	250
2385	178	6	0.25	5.7	15.2	245
2388	176	6.2	0.28	5.8	17.6	243
2391	174	6.7	0.28	6.3	17.1	251
2395	174	6.5	0.26	6.3	18.7	249
2398	175	6.3	0.26	6.2	17.6	251
2402	176	6.3	0.28	5.8	18.4	247
2405	176	6.2	0.25	5.9	18.3	249
2408	177	6	0.26	6.4	16.3	246
2412	173	6.5	0.26	6.9	17.7	254
2415	176	5.9	0.26	7.1	16	249
2419	173	6.2	0.24	5.8	16.6	252
2422	172	6.4	0.24	5.8	16.1	254
2426	173	6.6	0.24	5.9	20.2	254
2429	175	6.4	0.24	6.2	17.9	249
2433	172	6.5	0.23	5.9	17.4	252
2436	175	5.8	0.21	5.8	17.2	252
2440	177	5.7	0.22	5.1	16.5	253
2443	180	5.4	0.24	5	16.2	243
2446	176	6.2	0.24	6.1	19.4	246
2450	178	5.7	0.26	5.6	15	247
2453	179	5.8	0.29	5.4	17.4	246
2456	178	5.9	0.27	5.1	19.3	244
2460	178	5.7	0.23	5.4	17.6	247
2463	177	6	0.24	6	17.9	247
2467	176	6	0.22	6.3	17.9	250
2470	176	6	0.22	6.1	17.4	252
2473	177	5.7	0.23	5.5	15.5	246
2477	173	6.3	0.22	6.3	17	255
2480	176	5.8	0.22	6	16.2	249
2484	176	5.8	0.24	5.8	17.5	252
2487	179	5.7	0.25	5.5	15.5	244
2490	174	6.6	0.26	5.9	17.8	254
2494	177	6.3	0.26	6	18.2	250
2497	177	6.5	0.27	5.7	17.8	245
2501	174	6.3	0.27	6.2	19.2	251
2504	176	6.4	0.26	5.6	16.3	248
2507	181	6.2	0.3	5.5	21.1	237
2511	177	6.6	0.31	6.2	17.3	243
2514	171	7	0.27	6.7	18.5	254
2518	175	6.5	0.28	5.6	22.2	250
2521	165	6.2	0.24	5.4	24.1	275
2525	172	6.9	0.26	6	16.6	255
2528	175	6.7	0.24	5.9	17	249
2532	176	6.4	0.27	6.2	15.4	246
2535	177	6.4	0.26	6.6	16.7	248
2539	174	6.8	0.27	6.5	17.8	248
2542	176	6.4	0.26	6.2	15.8	247
2545	173	6.7	0.26	6.1	16.2	250
2549	176	6.6	0.29	5.9	15.9	246
2552	174	6.7	0.27	6	18	251
2556	175	6.7	0.29	6	17.1	249
2559	174	6.9	0.28	5.8	16.1	250
2563	175	6.6	0.27	6	16.6	249
2566	171	6.7	0.26	5.7	15.9	254
2570	172	7	0.28	5.9	16	254
2573	173	6.7	0.28	6	17.4	249
2577	175	6.6	0.28	6	17.7	249
2656	174	5.9	0.26	5	18.2	254
2659	176	6.2	0.28	5.8	15	248
2663	176	6	0.26	5.3	14.9	247
2666	180	5.7	0.3	4.6	14.1	239
2670	182	5.5	0.31	4.7	14.9	239
2674	179	5.9	0.29	4.9	17.1	243
2678	179	5.7	0.28	4.6	16	241
2683	179	6	0.32	5.7	16.1	242
2686	178	6.1	0.32	5.3	16.8	242
2689	179	6.1	0.31	4.9	17.5	243
2693	177	6.1	0.29	5	14.5	238
2696	185	5.8	0.29	5.2	16.7	237
2699	178	6.3	0.29	5.1	17.9	242
2703	181	5.9	0.29	5	15.6	239
2706	183	5.6	0.29	5.1	18	237
2709	178	6.1	0.29	5.6	16.3	246
2713	177	6.2	0.29	5.2	16.9	244
2716	178	5.9	0.26	5.6	16.1	244
2719	178	6.2	0.28	5.6	16.7	245
2723	179	5.9	0.26	5.4	16	243
2726	175	6.2	0.26	5.4	15.4	248
2730	177	5.9	0.25	5.5	17	246
2733	179	5.8	0.25	5.2	15.3	243
2736	178	6	0.25	5.8	17.3	246
2740	177	5.9	0.25	5.6	15.2	249
2743	178	6	0.26	5.4	14.9	242
2746	179	5.8	0.27	5.7	16.4	244
2750	180	6	0.27	5.9	16.9	240
2753	177	6.1	0.26	5.8	17.1	246
2757	178	6.2	0.26	6	16.1	244
2760	176	6.4	0.27	6.1	17.2	246
2763	175	6.2	0.26	6	16.9	251
2767	176	6.4	0.28	5.6	14.8	245
2770	172	6.6	0.25	5.6	16.3	254
2774	173	6.6	0.27	5.9	16.1	253
2777	178	6.3	0.28	5.7	17.2	241
2780	178	6.2	0.29	6.1	16.3	243
2784	175	6.3	0.28	5.8	16.6	248
2787	177	6.2	0.28	6.3	17.4	247
2791	177	6.4	0.28	5.9	17.2	244
2794	178	6.2	0.27	5.8	15.6	243
2797	178	6.5	0.28	5.9	17	245
2801	178	6.4	0.31	6.2	17.9	243
2804	177	6.4	0.29	6.2	17.3	243
2808	180	6.1	0.29	5.5	17.6	241
2811	179	6.3	0.3	5.7	16.7	242
2814	178	6.2	0.28	6.3	17	241
2818	179	6.2	0.3	5.7	16.7	241
2821	177	6.3	0.28	6.1	16.5	243
2824	178	6.1	0.28	5.9	17.7	244
2828	181	5.7	0.26	5.6	17.2	240
2831	181	5.9	0.27	5.2	18.3	241
2834	180	5.8	0.28	5.5	17.9	241
2838	180	5.9	0.28	5.3	18.1	242
2841	180	6.1	0.29	5	17.9	238
2844	180	6	0.3	5.2	18.4	241
2848	181	5.8	0.32	4.7	17.3	239
2851	181	6	0.31	5.5	22.1	238
2854	178	6.8	0.36	6.4	21.1	243
2858	177	7.3	0.41	6.5	20.1	242
2861	176	6.9	0.36	6.4	19.1	245
2865	178	6.3	0.33	5.5	17.2	242
2868	178	6.3	0.31	5.6	18.4	243
2871	177	6.5	0.28	5.9	18.7	245
2875	179	6	0.27	5.3	18.5	242
2878	180	6.2	0.28	5.5	19.2	238
2881	180	5.9	0.29	5.5	16.2	240
2885	177	6.2	0.29	5.1	16.2	243
2888	176	6.1	0.27	5.7	17.6	245
2892	178	6.2	0.28	5.1	17.3	243
2895	177	6	0.27	5.4	15.6	246
2898	177	6.3	0.29	5.6	16.8	242
2902	180	5.7	0.28	5.2	17.1	240
2905	177	6	0.27	5.3	17.8	244
2908	182	5.7	0.27	4.8	16.9	236
2912	177	6.2	0.29	5.6	17.5	243
2915	177	6.4	0.29	5.2	17.3	243
2918	180	5.6	0.27	5	16.7	244
2922	182	5.4	0.26	4.6	17.5	238
2925	181	5.6	0.26	4.6	17.9	241
2928	177	6	0.27	5.3	18.2	244
2932	181	5.5	0.28	4.9	16.4	240
2935	181	5.3	0.27	4.3	16.7	241
2938	182	5.2	0.27	6.4	15.6	244
2942	179	5	0.25	7	17.1	245
2945	178	5.4	0.25	6.8	17.4	244
2948	178	5.6	0.24	6	17.4	252
2952	177	6.2	0.29	5.1	16.6	246
2955	173	6.6	0.37	6.6	13.8	251
2959	173	6.8	0.39	5.9	18.8	250
2962	171	7.3	0.32	6.2	19.3	255
2966	174	6.7	0.27	5.1	16.8	255
2969	173	6.3	0.25	6.6	18	252
2973	176	5.7	0.23	8	14.6	251
2976	174	5.5	0.21	7.9	14.8	250
2980	174	5.8	0.23	6.7	14.2	252
2983	176	6.1	0.25	5.7	18.9	251
2986	174	6.6	0.28	5.7	19.7	253
2990	175	6.8	0.33	6.4	15.8	244
2993	175	6.9	0.39	6.2	16.8	244
2997	173	6.9	0.34	5.9	15.8	247
3000	177	6.2	0.27	5.3	17.5	246
3004	178	5.8	0.24	4.9	17.5	243
3007	179	5.6	0.24	4.9	16.8	245
3010	175	6.1	0.25	5	16.3	248
3014	174	6.1	0.26	5.4	16.6	249
3017	179	5.9	0.29	4.9	18.3	243
3021	177	6.2	0.28	5.2	18.5	247
3024	177	6.1	0.26	5.3	17.4	245
3027	177	6	0.24	5.2	18.3	247
3031	177	6	0.26	5.3	16.8	244
3034	179	5.9	0.26	4.7	17.5	246
3037	179	6.1	0.26	5.4	16.9	240
3041	178	6	0.25	5.5	16.3	242
3044	177	6.2	0.25	5.5	18.1	246
3048	177	6.1	0.25	5.8	17.8	244
3051	178	6	0.25	5.7	17.2	246
3054	175	6.5	0.25	5.7	17.6	251
3058	180	5.9	0.26	5.4	17.5	240
3061	177	6	0.26	5.6	17	248
3064	178	5.8	0.24	5.6	17.7	245
3068	179	5.8	0.25	5.2	16.4	244
3071	178	6.1	0.28	5.5	16.7	244
3075	178	5.9	0.28	5.5	18.3	242
3078	178	6.1	0.29	5.5	18.8	244
3081	179	6.2	0.3	5.3	17.3	242
3085	178	6.2	0.28	5.2	16.8	244
3088	177	6	0.25	5	15.5	248
3091	178	6.1	0.26	6.1	15.2	246
3095	177	5.9	0.24	5.4	16.4	248
3099	179	5.7	0.25	5.6	16	246
3103	178	6	0.27	6.2	17.2	242
3106	178	6	0.27	5.7	17.1	245
3109	178	5.8	0.24	5.5	15.8	247
3113	177	5.9	0.24	5.8	14.5	249
3116	180	5.6	0.26	5.8	15	240
3119	178	5.7	0.24	6	17.7	248
3123	179	5.6	0.25	5.6	15.8	247
3126	177	6	0.25	5.6	16.4	247
3130	177	5.7	0.25	5.3	16.7	248
3133	178	5.7	0.24	5.8	16.4	245
3136	180	5.6	0.24	6	17.2	244
3140	177	6	0.25	5.7	18.1	247
3143	180	5.5	0.27	5.3	17.2	242
3146	178	5.9	0.28	5	16.8	243
3150	179	6	0.28	6	19.6	242
3153	178	6.1	0.27	6.2	19.1	246
3156	176	6.1	0.28	5.6	18	245
3160	179	6.1	0.28	5.6	17.4	241
3163	180	5.8	0.26	5.7	18.4	240
3167	179	6	0.25	5.4	17.2	245
3170	175	5.9	0.26	5.5	16.3	251
3173	180	5.6	0.27	5.3	16.4	244
3177	177	5.7	0.25	5.1	16.6	244
3180	179	5.6	0.24	4.9	15.9	244
3183	177	5.9	0.25	5.4	17.1	247
3187	178	6	0.26	5.3	16.6	244
3190	177	6	0.27	5.5	18.5	243
3194	179	5.9	0.3	5.4	17.9	243
3197	179	5.8	0.29	5.3	17.9	244
3200	182	5.8	0.29	5	18.3	238
3204	179	6	0.29	5.7	19.9	243
3207	177	5.7	0.25	5.4	21.2	251
3210	179	5.5	0.25	5	20.5	246
3214	177	6	0.27	5.2	17.5	247
3217	179	6.1	0.27	5.4	17.1	243
3220	178	6	0.26	5.2	18.6	241
3224	179	5.7	0.25	5.2	18.7	244
3227	177	6.1	0.25	5.2	17.6	243
3230	179	5.8	0.24	4.8	17.4	246
3234	179	5.9	0.25	4.9	16.8	244
3237	180	5.9	0.25	5.4	17.6	242
3241	177	6.4	0.27	5.7	18.7	243
3244	180	6.4	0.28	5.2	18	239
